## 24 **Abstract**

25 Neonatal meningitis caused by *Escherichia coli* results in high mortality and neurological  
26 disabilities, and the concomitant systemic bacteremia confounds its mortality and brain  
27 injury. This study developed an experimental model of neonatal meningitis without  
28 concomitant systemic bacteremia by determining the bacterial inoculum of K1 capsule-  
29 negative *E. coli* by intraventricular injection in newborn rats. Meningitis was induced by  
30 intraventricular injection of  $1 \times 10^2$  (low dose),  $5 \times 10^2$  (medium dose), or  $1 \times 10^3$  (high dose)  
31 colony forming units (CFU) of K1 (-) *E. coli* (EC5ME) in Sprague-Dawley rats at postnatal  
32 day 11. Ampicillin was started at postnatal day 12. Blood and cerebrospinal fluid (CSF)  
33 cultures were performed at 6 h, 1 day, and 6 days after inoculation. Brain magnetic resonance  
34 imaging (MRI) was performed at postnatal days 12 and 17. Survival was monitored, and  
35 brain tissues were obtained for histological and biochemical analyses at P12 and P17.  
36 Survival was inoculum dose-dependent, with lowest survival in high dose group (20%)  
37 compared with medium (80%) or low (70%) dose group. CSF bacterial counts in low and  
38 medium dose group were significantly lower than that in high dose group at 6 h, but not at 24  
39 h after inoculation. No bacteria were isolated from the blood throughout the experiment, or  
40 from the CSF at postnatal day 17. Brain MRI showed an inoculum dose-dependent increase  
41 in the extent of ventriculomegaly, cerebral infarct, extent of brain injury, and inflammatory  
42 responses. We developed a newborn rat model of bacterial meningitis without concomitant  
43 systemic bacteremia by intraventricular injection of K1 (-) *E. coli*.

44

45

46

47

## 48 **Introduction**

49

50 Despite continuous improvements in antibiotic therapy and intensive care medicine,  
51 bacterial meningitis remains a serious disease at any age, and the prognosis is particularly  
52 poor in newborn infants, with mortality rates of 20–40% and long-term neurological  
53 sequelae, including deafness, blindness, seizures, hydrocephalus, and cognitive impairment in  
54 up to 50% of the survivors(1-3). The precise mechanisms by which bacterial infection and the  
55 ensuing inflammatory responses in the subarachnoid space during neonatal bacterial  
56 meningitis lead to neuronal injury that could result in death or neurological sequelae in  
57 survivors are not completely delineated. Therefore, a better understanding of the mechanism  
58 of brain damage is necessary to prevent this neuronal injury, and consequently to reduce the  
59 mortality and morbidities associated with neonatal bacterial meningitis.

60 Developing an appropriate animal model that could simulate clinical bacterial meningitis  
61 in newborn infants would be essential to determine its pathogenesis, and also to test the  
62 efficacy of newly developed adjuvant treatments in addition to the use of antibiotics.  
63 Currently, several animal models of neonatal bacterial meningitis, including newborn piglets  
64 (4), mice (5-7), rats (8, 9), or rabbits(10) are available, and meningitis was induced by various  
65 routes including intraperitoneal (5, 11), intranasal (6), intravenous (5, 10, 12), or  
66 intracisternal (7-10, 12) inoculation of bacteria. However, these animal models have certain  
67 drawbacks, including small sample size, low infectivity, high mortality, and/or variable  
68 extent of brain injury (11). Furthermore, concomitant bacteremia might aggravate the  
69 meningitis-induced brain injury (9, 13, 14), thus increasing mortality (8, 9, 15). Therefore, in  
70 the present study, we developed a newborn rat model of neonatal bacterial meningitis to  
71 mimic the human clinical and neuropathological abnormalities, using 11-day-old newborn

72 Sprague–Dawley rats with titrated intraventricular inoculation of *Escherichia coli*, the most  
73 common gram-negative pathogen of neonatal bacterial meningitis (3). We attempted to  
74 determine the bacterial inoculum dose with maximal brain injury and minimal mortality by  
75 using K1 capsule-negative *E. coli* to confine the infection to the central nervous system,  
76 without concomitant systemic bacteremia (12, 16). We inoculated the bacteria  
77 intraventricularly using a stereotaxic frame to simulate the neuropathological progression of  
78 clinical neonatal bacterial meningitis, which begins with ventriculitis (17, 18). Brain injury  
79 was monitored *in vivo* by brain magnetic resonance imaging (MRI) (19-22).

80

## 81 **MATERIALS AND METHODS**

82

### 83 ***Infecting organism***

84 We used EC5ME, an un-encapsulated mutant of *E. coli* strain possessing the K1 capsular  
85 polysaccharide C5 (serotype 018:K1:H7) (a kind gift from Professor Kwang Sik Kim, Johns  
86 Hopkins University, MD, USA)(12, 16) to induce only bacterial meningitis, but not  
87 secondary bacteremia, in this study. Bacteria were cultured overnight in brain heart infusion  
88 broth, diluted in fresh medium, and grown for another 6 h to mid-logarithmic phase. The  
89 culture was centrifuged at 5,000 ×g for 10 min, re-suspended in sterile normal saline to the  
90 desired concentration, and used for intraventricular injection. The accuracy of the inoculum  
91 size was confirmed by serial dilution, overnight culture on blood agar plates, and then count  
92 of colony forming units (CFU).

93

### 94 ***Animal model of meningitis***

95 The experimental protocols described herein including anticipated mortality was  
96 reviewed and approved by the Animal Care and Use Committee of Samsung Biomedical  
97 Research Institute which provides special training in animal care or handling for research  
98 staff. All animal procedures were performed in an AAALAC-accredited specific pathogen-  
99 free facility and done in accordance with Institutional and National Institutes of Health  
100 Guidelines for Laboratory Animal Care. Fig 1 shows details of the experimental schedule.  
101 The experiment began at P11, and continued through to P17. We assessed and monitored the  
102 condition of rat pups on a daily basis regularly. To induce meningitis, newborn Sprague-  
103 Dawley rats (Orient Co, Seoul, Korea) were anesthetized using 2% isoflurane in oxygen  
104 enriched air, and a total of 10  $\mu$ l EC5ME inoculum in saline was slowly infused into the left  
105 ventricle under stereotactic guidance (Digital Stereotaxic Instrument with Fine Drive,  
106 MyNeuroLab, St. Louis, MO, USA; coordinates:  $x = \pm 0.5$ ,  $y = \pm 1.0$ ,  $z = \pm 2.5$  mm relative to  
107 the bregma) at P11. To determine the optimal inoculum dose with minimal mortality and  
108 maximal brain injury, we tested three different inoculum doses of *E. coli*: A low inoculum  
109 dose of  $1 \times 10^2$  CFU EC5ME (LE), a medium inoculum dose of  $5 \times 10^2$  CFU EC5ME (ME),  
110 and a high inoculum dose of  $1 \times 10^3$  CFU EC5ME (HE). For normal control group (NC),  
111 equal volume of normal saline was given intraventricularly. After the procedure, the rat pups  
112 were allowed to recover and returned to their dams, and there was no mortality associated  
113 with the procedure. First, 10 rat pups for each group were allocated to assess the acute  
114 pathophysiological changes, and the survivors were sacrificed at 24 h (P12) after bacterial  
115 inoculation for histopathological assessment ( $n = 6, 5, 4$  and  $3$  for the NC, LE, ME and HE  
116 groups, respectively) and biochemical analyses ( $n = 4, 4, 4$  and  $3$  for the NC, LE, ME and HE  
117 groups, respectively). We also conducted the time course experiment in 10 animals for each  
118 group to determine the survival rate until sacrifice of the survivors at P17 for

119 histopathological assessment (n = 5, 4, 4 and 2 for the NC, LE, ME and HE groups,  
120 respectively) and biochemical analyses (n = 5, 3, 4 and 0 for the NC, LE, ME and HE groups,  
121 respectively). Intraperitoneal injection of ampicillin (200 mg/kg/day) was started 6 h after  
122 bacterial inoculation, and continued for 3 days until P13. CSF was obtained to determine the  
123 bacterial titer at 6 h, 24 h, and 6 days (P17) after bacterial inoculation. Brain MRI was  
124 performed at P12 and P17. All experimental procedures generating pain were performed  
125 under the isoflurane inhaled anesthesia to reduce pain. All animals were daily monitored and  
126 we assessed mortality. Every cause of death was not associated with experimental procedures  
127 and related to disease condition. At P12 and P17, survived animals were euthanized by  
128 isoflurane and sacrificed by cervical vertebra dislocation and whole brain tissue and CSF  
129 samples were obtained.

130

131 **Fig 1. Experimental protocol.** *E. coli* was injected intracerebroventricularly on P11 at  
132 different doses for each group; low dose of  $1 \times 10^2$  CFU, a medium dose of  $5 \times 10^2$  CFU, and  
133 a high dose of  $1 \times 10^3$  CFU. Brain MRI was performed before the rats were sacrificed.

134

135

### 136 ***Bacterial quantification***

137 Bacterial concentrations from each study group were measured in the CSF and blood at 6 h,  
138 24 h, and 6 days after bacterial inoculation for induction of meningitis. Bacteria CFU levels  
139 in the CSF and blood were measured at dilutions of  $10^{-4}$ – $10^{-8}$  plated on brain heart infusion  
140 agar after overnight incubation at 37°C.

141

### 142 ***In vivo brain MRI assessment***

143 The brain MRI was performed while the rats were kept in an anesthetized state by the  
144 administration of 1.5–2% isoflurane in oxygen-enriched air using a facemask. All MRI  
145 examinations were performed using a 7.0-tesla MRI System (Bruker-Biospin, Fällanden,  
146 Switzerland) prepared with a 20-cm gradient set capable of providing a rising time of 400  
147 mTm-1. The MR images were acquired with 1.0-mm slice thickness, and a total of 12 slices  
148 were acquired. Brain MRI was performed at P12 (n = 10, 9, 8 and 6 in the NC, LE, ME and  
149 HE groups, respectively) and at P17 (n = 11, 7, 8 and 2 in the NC, LE, ME and HE groups,  
150 respectively). After the MRI exams, the rat pups were allowed to recover and were returned  
151 to their dams.

152

### 153 ***Measurement of the extent of brain injury by MRI***

154 All MR images were analyzed using Image J software (National Institutes of Health). The  
155 lesion was well identified by the hyperintense areas in DWI at P12 and by the hyperintense  
156 areas in T2-weighted imaging at P17. The ratio of the infarcted region in the cortex to the  
157 whole brain volume was calculated as a parameter of brain injury. The ventriculomegaly  
158 volume ratio was also calculated for each pup.

159

### 160 ***Tissue preparation***

161 Brain tissue preparation procedures were performed in the surviving animals until P12 (n =  
162 10, 9, 8 and 6 in the NC, LE, ME and HE groups, respectively) and P17 (n = 10, 7, 8 and 2 in  
163 the NC, LE, ME and HE groups, respectively). The animals were anesthetized with sodium  
164 pentobarbital (100 mg/kg), and their brains were isolated after thoracotomy and transcardiac  
165 perfusion with ice-cold 4% paraformaldehyde in 0.1 mol/l phosphate-buffered saline (PBS).  
166 The brains were carefully removed from the animals and fixed overnight with 4%

167 formaldehyde solution at room temperature. The brains were embedded in paraffin, and  
168 coronal serial sections (4- $\mu$ m thick) were taken from the paraffin blocks for morphometric  
169 analyses at the level of the medial septum area (+0.95 mm to -0.11/bregma) and the  
170 hippocampal area (-2.85 to -3.70 mm). The sections were stained with hematoxylin and  
171 eosin to assess the extent of neuronal damage.

172

### 173 ***TUNEL Assay***

174 Cell death in the hippocampal region was assessed using the immunofluorescent terminal  
175 deoxynucleotidyltransferase-mediated deoxyuridine triphosphate nick-end labeling (TUNEL)  
176 technique (kit G3250, Promega, Madison, USA). The slides were mounted with Vectashield  
177 mounting solution with 4', 6'-diamidino-2-phenylindole dihydrochloride hydrate (DAPI; H-  
178 1200; Vector) and visualized by 20 $\times$  (dentate gyrus) and 5 $\times$  tiles can confocal microscopy  
179 (Leica, Wetzlar, Germany). A blinded evaluator counted the density of TUNEL-positive  
180 nuclei in whole brain on coronal brain sections. Six coronal sections (+0.95 mm to -0.11  
181 mm/bregma) were counted from each brain.

182

### 183 ***Immunohistochemistry***

184 Immunohistochemistry of gliosis (neuronal specific glial fibrillary acidic protein [GFAP])  
185 and reactive microglia (ED-1) was performed on deparaffinized 4- $\mu$ m thick brain sections.  
186 The slices were incubated with the primary anti-GFAP antibodies (rabbit polyclonal; Dako,  
187 Glostrup, Denmark, overnight, 4 °C, 1:1,000 in PBS with 1% bovine serum albumin) and the  
188 anti-ED-1 antibodies (mouse polyclonal; Millipore, CA, USA, overnight, 4 °C, 1:500 in PBS  
189 with 1% bovine serum albumin). After three rinses (same buffer), the sections were incubated



190 with Alexa Fluor 568 (red) conjugated anti-rabbit immunoglobulin (90 min, diluted 1:500;  
191 Molecular Probes, Eugene, OR, USA) and Alexa Fluor 568 (red) conjugated anti-mouse  
192 immunoglobulin (90 min, diluted 1:500; Molecular Probes, Eugene Oregon) each. After three  
193 rinses, the sections were mounted with Vectashield mounting solution containing 4', 6'-  
194 diamidino-2-phenylindole dihydrochloride hydrate and visualized by 20× (dentate gyrus) and  
195 5× tilescan confocal microscopy (Leica). The density of GFAP-positive cells and the number  
196 of ED-1-positive cells were determined by a blinded observer in whole tilescan fields of each  
197 animal's brain using ImageJ software.

198

### 199 ***Enzyme-linked immunosorbent assay (ELISA)***

200 IL-1 $\alpha$ , IL-1 $\beta$ , IL-6, and TNF- $\alpha$  concentrations in tissue homogenates were measured at P12  
201 and P17 using the Milliplex MAP ELISA Kit according to the manufacturer's protocol  
202 (Millipore, Billerica, MA, USA).

203

### 204 ***Statistical analyses***

205 Statistical analyses were performed using SPSS version 18.0 (IBM, Chicago, IL, USA). Data  
206 are expressed as the mean  $\pm$  standard error of the mean. For continuous variables, statistical  
207 comparison between groups was performed using one-way analysis of variance (ANOVA)  
208 and Tukey's post hoc analysis.  $P < 0.05$  was considered statistically significant.

209

## 210 **Results**

211

### 212 ***Survival rates and body weight***

213 Fig 1 shows the details of the experimental schedule. The experiment began at P11 and  
214 continued through to P17. To induce meningitis, at P11, three different doses of *E. coli* were  
215 injected into the cerebroventricles of newborn rats; low inoculum dose of  $1 \times 10^2$  CFU  
216 (colony forming unit) EC5ME (LE), a medium inoculum dose of  $5 \times 10^2$  CFU EC5ME  
217 (ME), and a high inoculum dose of  $1 \times 10^3$  CFU EC5ME (HE). The survival rate after  
218 induction of bacterial meningitis was bacterial inoculum dose-dependent, showing the lowest  
219 survival rate up to postnatal day (P)17 of 20% for the high inoculum dose (HE), and 70% and  
220 80% for LE and ME doses, respectively (Fig 2A). While survival rate up to P17 in the HE  
221 group was significantly lower compared to that in the no inoculum control (NC), the survival  
222 rate of the LE and ME groups was not significantly reduced compared with the NC group.

223 While birth body and brain weight in each study group was not significantly different  
224 between the study groups; the body weight gain at P17 in the LE, ME, and HE groups was  
225 significantly lower, the brain weight gain in the ME and HE groups was significantly lower,  
226 and the brain/body weight ratio in the ME and HE groups was significantly higher compared  
227 with the those in the NC group. The least body and brain weight gain, and the highest  
228 brain/body ratio, were observed in the HE group compared with those in the LE and ME  
229 groups (Fig 2B-D).

230

231 **Fig 2. Survival rates.** (A) Survival rates in each group were determined using Kaplan–Meier  
232 analysis followed by a log-rank test. LE, low dose *E. coli* group; ME, medium dose *E. coli*  
233 group; HE, high dose *E. coli* group. (B) Brain weight and (C) body weight were measured at  
234 P17 in each group (n=11, 7, 9 and 2 in NC, LE, ME, and HE, respectively). Both weights  
235 decreased significantly depending on the *E. coli* dose. (D) The ratio of brain weight: body  
236 weight significantly increased in the HE group compared with the other groups others. Data

237 are presented as the mean  $\pm$  standard error of the mean (SEM). \*  $P < 0.05$  compared with the  
238 NC group, #  $P < 0.05$  compared with the LE group, \$  $P < 0.05$  compared with the ME group.

239

### 240 ***Bacterial counts***

241 To evaluate the bacterial burdens, the CFU were counted in the cerebrospinal fluid (CSF)  
242 and blood from each study groups at 6 h (P11), 24 h (P12), and 6 days (P17) after induction  
243 of meningitis. While no bacterial growth in the blood was detected in all study groups  
244 throughout the experiment, the bacterial counts in the CSF at 6 h after the induction of  
245 meningitis in both the LE and ME were significantly lower compare with that in the HE.  
246 Thereafter, the bacterial counts in the CSF of all study groups increased significantly  
247 compared with that at 6 h, and there were no significant inter-group differences at 24 h after  
248 the induction of meningitis (Fig 3). No bacterial growth in the CSF was detected all study  
249 groups at 6 days after the induction of meningitis.

250

251 **Fig 3. Bacterial counts in the CSF.** Bacterial counts in the CSF obtained at 6 and 24 h after  
252 bacterial inoculation and before initiation of antibiotic treatment. LE, low dose *E. coli* group;  
253 ME, medium dose *E. coli* group; HE, high dose *E. coli* group. Data are presented as the mean  
254  $\pm$  SEM. \*  $P < 0.05$  compared with the NC group, #  $P < 0.05$  compared to LE, \$  $P < 0.05$   
255 compared to ME.

256

### 257 ***Brain MRI***

258 To assess the extent of meningitis-induced brain infarction and hydrocephalus, *in vivo*  
259 brain MRI scans were taken. The degree of the brain infarct in the ipsilateral cortex and the  
260 dilatation of the ventricle to whole brain as evidenced by the hyperintense areas in the

261 diffusion-weighted MRI performed at P12 and by T2-weighted MRI performed at P17 were  
262 measured.

263 The brain infarct volume ratios at P12 and P17 were bacterial inoculum dose-dependently  
264 increased, showing the highest ratio in the HE group, and a seemingly increased ratio in the  
265 ME group compared with that in the LE group that did not reach statistical significance (Fig  
266 4). The ventriculomegaly volume ratios at P12 were bacterial inoculum dose-dependently  
267 increased, showing the highest increase in the HE group compared with that in the LE and  
268 ME groups. In addition, although the absolute extent of ventriculomegaly was significantly  
269 reduced compared with P12, the ventriculomegaly volume ratios at P17 were also bacterial  
270 inoculum dose-dependently increased, showing the highest increase in the HE group  
271 compared with that in the LE and ME groups (Fig 4).

272

273 **Fig 4. Evolution of brain injury at P12 and P17.** (A) Representative brain MRIs of the NE  
274 (no *E. coli* control) (left column), LE (middle left column), ME (middle right column), and  
275 HE (right column) groups from the medial septal area on day 1 and day 6 after meningitis  
276 (P12 and P17). (B) The intact volume of the cortex area to whole brain ratio and (C) the  
277 ventriculomegaly volume ratio were measured by MRI at P12 and P17. LE, low dose *E. coli*  
278 group; ME, medium dose *E. coli* group; HE, high dose *E. coli* group. Data are presented as  
279 the mean  $\pm$  SEM. \*  $P < 0.05$  compared with the NC group, #  $P < 0.05$  compared with the LE  
280 group, \$  $P < 0.05$  compared with the ME group.

281

## 282 ***TUNEL staining and immunohistochemistry***

283 To assess the extent of bacterial meningitis-induced cell death, and reactivate gliosis and  
284 microglia in the brain, the number of terminal deoxynucleotidyltransferase-mediated

285 deoxyuridine triphosphate nick-end labeling (TUNEL)- and ED-1 (Ectodysplasin A) positive  
286 cells, and the density of glial fibrillary acidic protein (GFAP)-positive cells in the  
287 hippocampus were estimated at 24 h after induction of meningitis (P12). The number of  
288 TUNEL- and ED-1 positive cells, and the intensity of GFAP-positive cells in the  
289 hippocampus at P12 were bacterial inoculum dose-dependently increased compared with the  
290 NC group, showing the highest increase in the HE group. The increased number of TUNEL  
291 positive cells and the intensity of GFAP positive cells in the ME group were significantly  
292 higher compared with those in the LE group (Fig 5).

293

294 **Fig 5. Immunostaining in the hippocampus region.** Representative photomicrographs of  
295 (A) TUNEL, (C) GFAP intensity, and (E) ED-1 positive cells in the brain of P12 rats in each  
296 group. TUNEL intensity was labeled with FITC (green); GFAP and ED-1 positive cells were  
297 labeled with TRITC (red). The cell nuclei were labeled with DAPI (blue) (Scale bar = 25  
298  $\mu\text{m}$ ). The average intensity of observed (B) TUNEL and (D) GFAP, and the average number  
299 of (F) ED-1 positive cells per high-power field (HPF) in each group are also represented. LE,  
300 low dose *E. coli* group; ME, medium dose *E. coli* group; HE, high dose *E. coli* group. Data  
301 are presented as the mean  $\pm$  SEM. \*  $P < 0.05$  compared with the NC group, #  $P < 0.05$   
302 compared with the LE group, \$  $P < 0.05$  compared with the ME group.

303

### 304 ***Inflammatory Cytokines in Brain***

305 Levels of inflammatory cytokines, such as interleukin (IL)-1 $\alpha$ , IL-1 $\beta$ , IL-6, and tumor  
306 necrosis factor alpha (TNF- $\alpha$ ) measured in the periventricular brain tissue homogenates at  
307 P12 revealed bacterial inoculum dose-dependent increase, showing the highest increase in the  
308 HE group. The inflammatory cytokine levels in the ME group were significantly higher

309 compared with those in the LE group (Fig 6). Although the brain homogenates of the HE  
310 group were not available for measurements because of their high mortality at P17, and the  
311 absolute levels of the inflammatory cytokines were significantly reduced compared with P12,  
312 the inflammatory cytokines were bacterial inoculum dose-dependently increased, showing  
313 significantly higher levels in the ME group compared with those in the LE group.

314

315 **Figure 6. Inflammatory cytokines of brain.** Interleukin [IL]-1 $\alpha$ , IL-1 $\beta$ , IL-6, and tumor  
316 necrosis factor [TNF]- $\alpha$  concentrations in brain tissue homogenates at (A) P12 and (B) P17,  
317 were measured using ELISA in each group. LE, low dose *E. coli* group; ME, medium dose *E.*  
318 *coli* group; HE, high dose *E. coli* group. Data are presented as the mean  $\pm$  SEM. \* P < 0.05  
319 compared with the NC group, # P < 0.05 compared with the LE group, \$ P < 0.05 compared  
320 with the ME group.

321

## 322 Discussion

323 Despite recent improvements in neonatal intensive care medicine and development of  
324 highly active new antibiotics, neonatal bacterial meningitis remains a serious disease with  
325 high mortality and neurological morbidities in survivors(1, 3). Currently, few effective  
326 adjuvant therapies are available to improve the prognosis of this intractable and devastating  
327 neonatal disorder. Therefore, developing an appropriate animal model to simulate clinical  
328 bacterial meningitis in newborn infants is an essential first step to determine its  
329 pathophysiological mechanisms, and to test the therapeutic efficacy of any potential new  
330 treatments. However, the limitations of currently available experimental models of meningitis  
331 lie in the great variability between the species, the inoculation methods, and the age of the  
332 animal models (11). In this study, we used P11 rats as an animal model of neonatal

333 meningitis because the rat brain at P11 is comparable in terms of maturation to the human  
334 brain at birth (23). The larger size of rat pups compared with mice enables easier surgical  
335 manipulation at an earlier age, and a larger amount of brain tissues obtained at harvest.  
336 Furthermore, our already established newborn rat model of severe Intraventricular  
337 hemorrhage (20-22), middle cerebral arterial occlusion (24), and hypoxic ischemic  
338 encephalopathy (25) with *in vivo* brain MRI and histopathological analyses to study the  
339 pathophysiological mechanisms and therapeutic efficacy could be easily extrapolated to  
340 develop a newborn rat model of meningitis in this study. Overall, the findings of the present  
341 study suggested that the newborn rat pup model is suitable and appropriate to research the  
342 pathogenesis of neonatal bacterial meningitis and to test the efficacy new treatments.

343 In this study, *E. coli* was used to induce meningitis, because it is the most frequent  
344 gram-negative pathogen of neonatal bacterial meningitis (3). Although brain injury primarily  
345 results from local meningeal infection, concomitant systemic bacteremia might aggravate the  
346 meningitis-induced disease severity, brain injury, and mortality (9, 13-15). This discordance  
347 between disease severity and brain injury means that a poorer outcome does not necessarily  
348 lead to increased brain injury (15, 19). In addition, neuroprotection might not be associated  
349 with improved clinical status (26). Therefore, developing an animal model of neonatal  
350 meningitis that could dissect the role of local meningeal infection and systemic bacteremia is  
351 essential to evaluate the pathophysiological mechanism of brain injury and to test the  
352 therapeutic efficacy of any new treatment approaches to reduce the meningitis-induced  
353 sequelae and to improve outcome and survival. As the K1 capsule is the critical determinant  
354 for developing *E. coli* meningitis in rats, we used K1(-) *E. coli* in this study to prevent  
355 secondary systemic bacteremia (12, 16). Although we observed secondary bacterial invasion  
356 from the central nervous system (CNS) into the blood stream once the bacterial concentration

357 in the CSF reached above  $10^5$  CFU in our previous experimental study of *E. coli* meningitis  
358 in newborn piglets (27), in the present study, we observed no concomitant secondary  
359 bacteremia, despite high bacterial concentrations in the CSF well above  $10^5$  CFU. Overall,  
360 the use of K1 (-) *E. coli* is suitable to study the pathophysiological consequences of  
361 meningitis only and the effects of various therapeutic interventions, without the confounding  
362 effects of simultaneous systemic bacteremia.

363 The neuropathology of neonatal bacterial meningitis begins with choroid plexitis and  
364 ventriculitis (18, 28, 29), and progresses to arachnoiditis and vasculitis, leading to brain  
365 edema, hydrocephalus, infarction, and periventricular leukomalacia (30). In the present study,  
366 K1 (-) *E. coli* was injected intraventricularly to induce meningitis because although it  
367 bypasses the natural hematogenous bacterial invasion across the blood brain barrier into the  
368 CNS(12, 16), this experimental model is more clinically relevant by simulating the clinical  
369 neuropathological progression of neonatal bacterial meningitis beginning with ventriculitis  
370 (18, 28, 29).

371 In the present study, we tested three different doses of K1 (-) *E. coli* (EC5ME) for the  
372 induction of meningitis to determine the optimal inoculum dose with minimal mortality and  
373 maximal brain injury;  $1 \times 10^2$  CFU for the LE group,  $5 \times 10^2$  CFU for the ME group, and  $1 \times$   
374  $10^3$  CFUs for the HE group. Survival rates, body and brain weight gain, the extent of  
375 inflammatory responses and brain injury correlated significantly with the inoculum dose used  
376 to induce meningitis, showing highest mortality, extent of inflammatory responses, and brain  
377 injury, and the least body and brain weight gain. We also observed higher inflammatory  
378 responses and the least extent of brain injury in the ME and LE groups, respectively. The  
379 mortality rate was positively correlated with the inoculum dose and the extent of  
380 inflammatory responses and brain injury. As blood culture was negative throughout the



381 experiment, the inoculum dose-dependent increase in mortality, inflammatory responses, and  
382 brain injury solely reflects the virulence of EC5ME meningitis, without the confounding  
383 effects of the concomitant systemic bacteremia. Overall, these findings suggest that ME ( $5 \times$   
384  $10^2$  CFU) of EC5ME might be optimal inoculum dose to induce neonatal meningitis.

385 Because bacterial meningitis induces high mortality in newborn infants, the design of  
386 animal study was also driven to target for severe, end-stage models. From an ethics  
387 viewpoint, this use contradicts views that death as an endpoint is unacceptable. However, the  
388 use of alternative end point can generate scientific concerns. Because minor improvements in  
389 mortality rates are regarded as major advances in treatment, indefinite endpoint may skew  
390 data. Thus, for the development of neonatal meningitis model with proper mortality, precise  
391 mortality rate without premature euthanasia was required. Unfortunately, in meningitis  
392 model, replacement of animal model is extremely difficult because *in vivo* immune response  
393 is too complicated to model in *in vitro* system. For the animal welfare, the development of  
394 appropriate model which we aimed in the present study would be essential to reduce animal  
395 numbers and may be the most valuable refinement for meningitis study.

396 In infants with bacterial meningitis, brain MRI scans showed abnormalities including  
397 cerebral infarct, subdural empyema, cerebritis, and hydrocephalus(19). Increased brain  
398 ventriculomegaly in the acute phase of bacterial meningitis in adults was associated with  
399 increased mortality (31). In agreement with the clinical findings(19, 31), an acute inoculum  
400 dose-dependent increase in ventriculomegaly and cerebral infarct was observed at 1 day after  
401 the induction of meningitis. In addition, although a less absolute extent of ventriculomegaly  
402 and a higher extent of cerebral infarct were observed compared with post-inoculation day 1,  
403 the inoculum dose-dependent abnormalities persisted at 6 days after the induction of  
404 meningitis. Taken together, these findings suggested that brain MRI could be an early

405 prognostic indicator that would be useful to identify patients requiring further therapeutic  
406 interventions, and to assess the therapeutic efficacy of any new treatments, both in clinical  
407 and experimental settings of meningitis (19, 31).

408 Brain injuries observed in experimental models of neonatal meningitis are unique in  
409 consistently reproducing both hippocampal damage and cortical necrosis (7-9). Inflammatory  
410 responses are primarily responsible for the ensuing brain injury in bacterial meningitis (3, 7,  
411 8, 16). In the present study, the extent of inflammatory responses both at post-inoculation day  
412 1 and 6, and the increased number of TUNEL, GFAP, and ED-1 positive cells in the  
413 hippocampus at 1 day after induction of meningitis, were associated with the bacterial  
414 inoculum dose. Antibiotic treatment was started 24 h after bacterial inoculation, and  
415 continued for 3 days: no bacteria were isolated, even in the CSF, at 5 days after the induction  
416 of meningitis. Taken together, these findings suggested that increased inflammatory  
417 responses, but not increased bacterial proliferation and dissemination, triggered by a higher  
418 bacterial inoculum, are primarily responsible for the ensuing brain injury.

419 In summary, we successfully developed a newborn rat model of neonatal bacterial  
420 meningitis without concomitant systemic bacteremia by intraventricular injection of K1  
421 capsule-negative *E. coli* at P11. We also determined that a bacterial inoculum dose of  $5 \times 10^2$   
422 CFU of EC5ME had the minimum mortality, and maximal inflammatory responses and  
423 ensuing brain injury. This animal model is more clinically relevant because neonatal  
424 meningitis begins with ventriculitis (18, 28, 29), and could provide the basis for both  
425 pathophysiology and intervention studies for neonatal bacterial meningitis not confounded by  
426 simultaneous systemic bacteremia. Hopefully, our newly developed newborn rat model of  
427 neonatal meningitis will lead to more detailed knowledge of, and new treatments for, this  
428 intractable and devastating disorder.

## 429 **Funding**

430 This work was supported by grant from the Korea Health Technology R&D Project through  
431 the Korea Health Industry Development Institute (KHIDI), funded by  
432 the Ministry of Health & Welfare, Republic of Korea (HR14C0008) and the Basic Science  
433 Research Program through the National Research Foundation of Korea (NRF) funded by the  
434 Ministry of Education, Science and Technology (NRF-2017R1D1A1B03035528, NRF-  
435 2017R1A2B2011383).

436

## 437 **Author contributions**

438 Yun Sil Chang and So Yoon Ahn contributed equally as co-first authors in conceptualization  
439 of the study design and hypothesis, data collection and analysis, manuscript writing and  
440 revision. Won Soon Park contributed the study idea, design, and hypothesis, data collection  
441 and analysis, critically reviewed and revised the manuscript, and serves as the corresponding  
442 author. So Yoon Joo, Dong Kyung Sung, and Young Eun Kim contributed conceptualization  
443 of the study design, biochemical analysis and wrote a portion of the manuscript, and critically  
444 reviewed and revised the manuscript. All authors listed above have read and approved the  
445 manuscript.

446

447

448

449

450

451

452 **References**

- 453 1. Anderson SG, Gilbert GL. Neonatal gram negative meningitis: a 10-year review,  
454 with reference to outcome and relapse of infection. *Journal of paediatrics and child health*.  
455 1990;26(4):212-6.
- 456 2. Edwards MS, Rensch MA, Haffar AA, Murphy MA, Desmond MM, Baker CJ. Long-  
457 term sequelae of group B streptococcal meningitis in infants. *The Journal of pediatrics*.  
458 1985;106(5):717-22.
- 459 3. Polin RA, Harris MC. Neonatal bacterial meningitis. *Seminars in neonatology* : SN.  
460 2001;6(2):157-72.
- 461 4. Park WS, Chang YS, Lee M. Effect of induced hyperglycemia on brain cell  
462 membrane function and energy metabolism during the early phase of experimental meningitis  
463 in newborn piglets. *Brain research*. 1998;798(1-2):195-203.
- 464 5. Tsao N, Chang WW, Liu CC, Lei HY. Development of hematogenous pneumococcal  
465 meningitis in adult mice: the role of TNF-alpha. *FEMS immunology and medical*  
466 *microbiology*. 2002;32(2):133-40.
- 467 6. Zwijnenburg PJ, van der Poll T, Florquin S, van Deventer SJ, Roord JJ, van Furth  
468 AM. Experimental pneumococcal meningitis in mice: a model of intranasal infection. *The*  
469 *Journal of infectious diseases*. 2001;183(7):1143-6.
- 470 7. Grandgirard D, Steiner O, Tauber MG, Leib SL. An infant mouse model of brain  
471 damage in pneumococcal meningitis. *Acta neuropathologica*. 2007;114(6):609-17.
- 472 8. Gianinazzi C, Grandgirard D, Imboden H, Egger L, Meli DN, Bifrare YD, et al.  
473 Caspase-3 mediates hippocampal apoptosis in pneumococcal meningitis. *Acta*  
474 *neuropathologica*. 2003;105(5):499-507.
- 475 9. Brandt CT, Holm D, Liptrot M, Ostergaard C, Lundgren JD, Frimodt-Moller N, et al.

- 476 Impact of bacteremia on the pathogenesis of experimental pneumococcal meningitis. The  
477 Journal of infectious diseases. 2008;197(2):235-44.
- 478 10. Tauber MG, Sande MA. Pathogenesis of bacterial meningitis: contributions by  
479 experimental models in rabbits. Infection. 1984;12 Suppl 1:S3-10.
- 480 11. Chiavolini D, Pozzi G, Ricci S. Animal models of Streptococcus pneumoniae  
481 disease. Clinical microbiology reviews. 2008;21(4):666-85.
- 482 12. Kim KS, Itabashi H, Gemski P, Sadoff J, Warren RL, Cross AS. The K1 capsule is  
483 the critical determinant in the development of Escherichia coli meningitis in the rat. The  
484 Journal of clinical investigation. 1992;90(3):897-905.
- 485 13. Holler JG, Brandt CT, Leib SL, Rowland IJ, Ostergaard C. Increase in hippocampal  
486 water diffusion and volume during experimental pneumococcal meningitis is aggravated by  
487 bacteremia. BMC infectious diseases. 2014;14:240.
- 488 14. Ostergaard C, Leib SL, Rowland I, Brandt CT. Bacteremia causes hippocampal  
489 apoptosis in experimental pneumococcal meningitis. BMC infectious diseases. 2010;10:1.
- 490 15. Brandt CT, Lundgren JD, Frimodt-Moller N, Christensen T, Benfield T, Espersen F,  
491 et al. Blocking of leukocyte accumulation in the cerebrospinal fluid augments bacteremia and  
492 increases lethality in experimental pneumococcal meningitis. Journal of neuroimmunology.  
493 2005;166(1-2):126-31.
- 494 16. Kim KS. Pathogenesis of bacterial meningitis: from bacteraemia to neuronal injury.  
495 Nature reviews Neuroscience. 2003;4(5):376-85.
- 496 17. Chua C. Neonatal meningitis and ventriculitis. Journal of the National Medical  
497 Association. 1978;70(11):794-5.
- 498 18. Berman PH, Banker BQ. Neonatal meningitis. A clinical and pathological study of  
499 29 cases. Pediatrics. 1966;38(1):6-24.

- 500 19. Brandt CT, Simonsen H, Liptrot M, Sogaard LV, Lundgren JD, Ostergaard C, et al.  
501 In vivo study of experimental pneumococcal meningitis using magnetic resonance imaging.  
502 BMC medical imaging. 2008;8:1.
- 503 20. Ahn SY, Chang YS, Sung DK, Sung SI, Yoo HS, Lee JH, et al. Mesenchymal stem  
504 cells prevent hydrocephalus after severe intraventricular hemorrhage. Stroke; a journal of  
505 cerebral circulation. 2013;44(2):497-504.
- 506 21. Ahn SY, Chang YS, Sung DK, Sung SI, Ahn JY, Park WS. Pivotal Role of Brain-  
507 Derived Neurotrophic Factor Secreted by Mesenchymal Stem Cells in Severe Intraventricular  
508 Hemorrhage in Newborn Rats. Cell Transplant. 2017;26(1):145-56.
- 509 22. Ahn SY, Chang YS, Sung DK, Sung SI, Yoo HS, Im GH, et al. Optimal Route for  
510 Mesenchymal Stem Cells Transplantation after Severe Intraventricular Hemorrhage in  
511 Newborn Rats. PloS one. 2015;10(7):e0132919.
- 512 23. Romijn HJ, Hofman MA, Gramsbergen A. At what age is the developing cerebral  
513 cortex of the rat comparable to that of the full-term newborn human baby? Early human  
514 development. 1991;26(1):61-7.
- 515 24. Kim ES, Ahn SY, Im GH, Sung DK, Park YR, Choi SH, et al. Human umbilical cord  
516 blood-derived mesenchymal stem cell transplantation attenuates severe brain injury by  
517 permanent middle cerebral artery occlusion in newborn rats. Pediatric research.  
518 2012;72(3):277-84.
- 519 25. Park WS, Sung SI, Ahn SY, Yoo HS, Sung DK, Im GH, et al. Hypothermia  
520 augments neuroprotective activity of mesenchymal stem cells for neonatal hypoxic-ischemic  
521 encephalopathy. PloS one. 2015;10(3):e0120893.
- 522 26. Leib SL, Kim YS, Ferriero DM, Tauber MG. Neuroprotective effect of excitatory  
523 amino acid antagonist kynurenic acid in experimental bacterial meningitis. The Journal of

- 524 infectious diseases. 1996;173(1):166-71.
- 525 27. Park WS, Chang YS, Ko SY, Kang MJ, Han JM, Lee M. Effects of microbial  
526 invasion on cerebral hemodynamics and oxygenation monitored by near infrared  
527 spectroscopy in experimental Escherichia coli meningitis in the newborn piglet. Neurological  
528 research. 1999;21(4):391-8.
- 529 28. Daum RS, Scheifele DW, Syriopoulou VP, Averill D, Smith AL. Ventricular  
530 involvement in experimental Hemophilus influenzae meningitis. The Journal of pediatrics.  
531 1978;93(6):927-30.
- 532 29. Gilles FH, Jammes JL, Berenberg W. Neonatal meningitis. The ventricle as a  
533 bacterial reservoir. Archives of neurology. 1977;34(9):560-2.
- 534 30. Friede RL. Cerebral infarcts complicating neonatal leptomeningitis. Acute and  
535 residual lesions. Acta neuropathologica. 1973;23(3):245-53.
- 536 31. Sporrborn JL, Knudsen GB, Solling M, Seieroe K, Farre A, Lindhardt BO, et al.  
537 Brain ventricular dimensions and relationship to outcome in adult patients with bacterial  
538 meningitis. BMC infectious diseases. 2015;15:367.
- 539

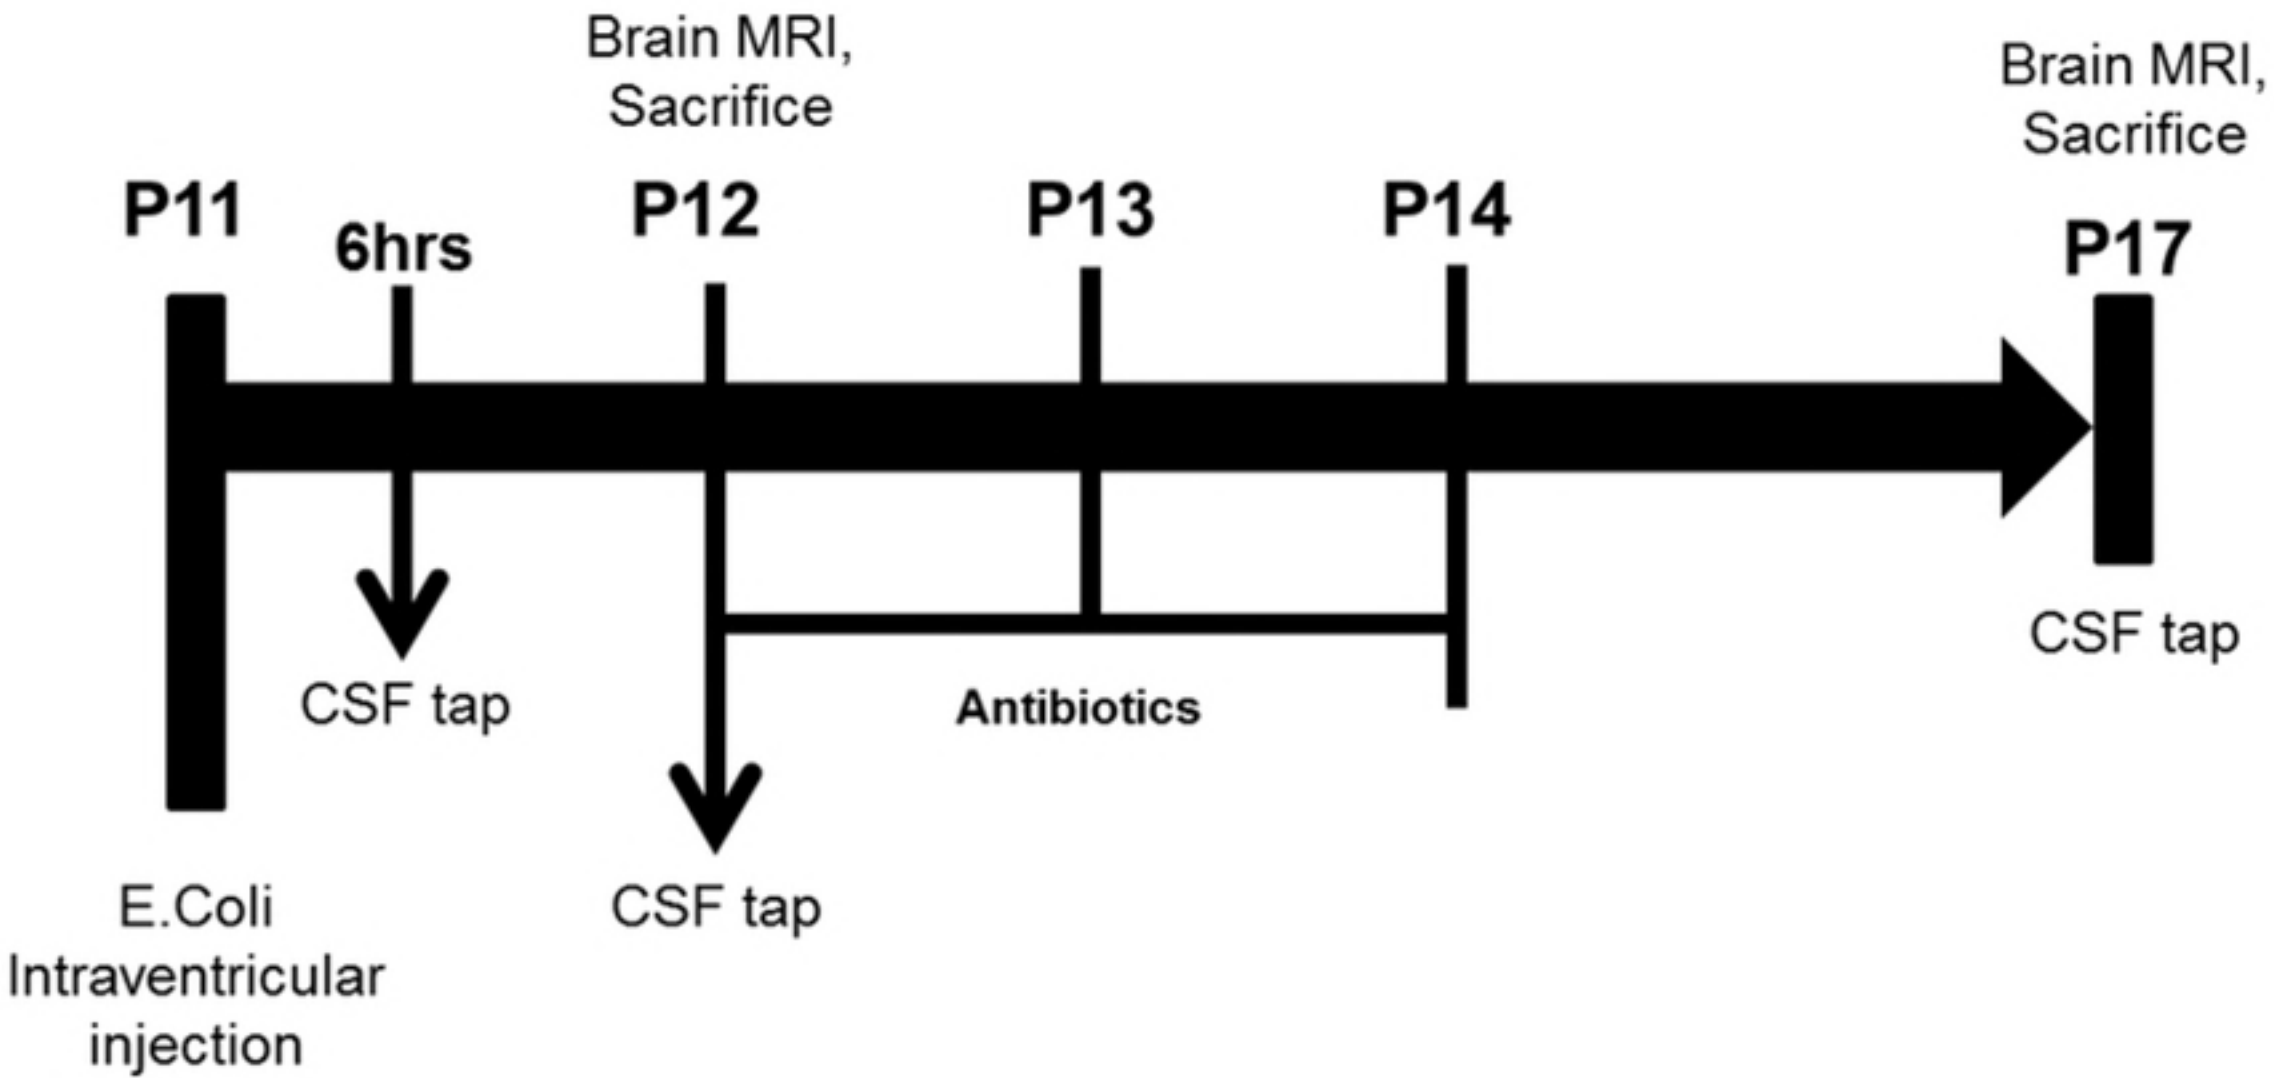



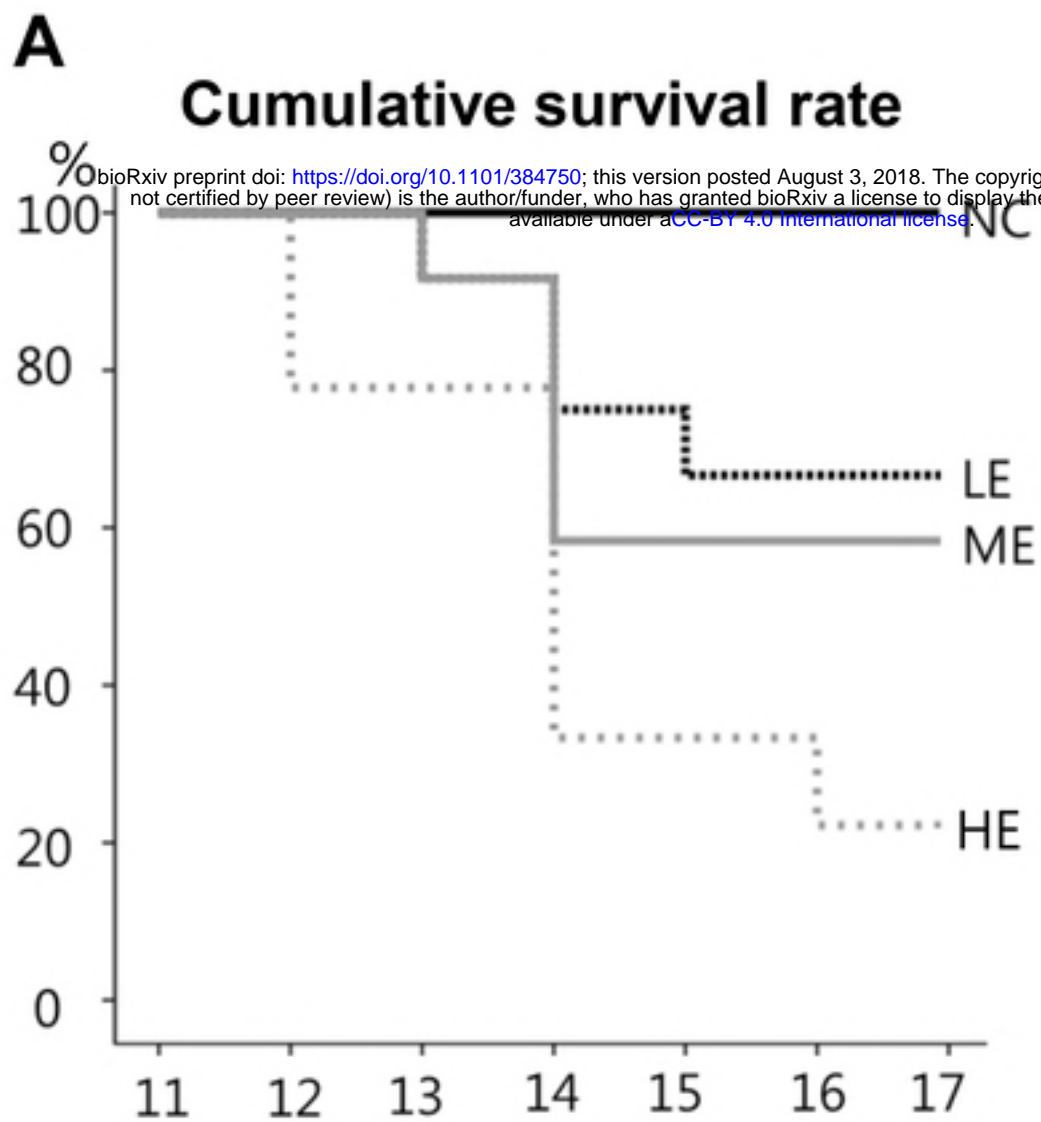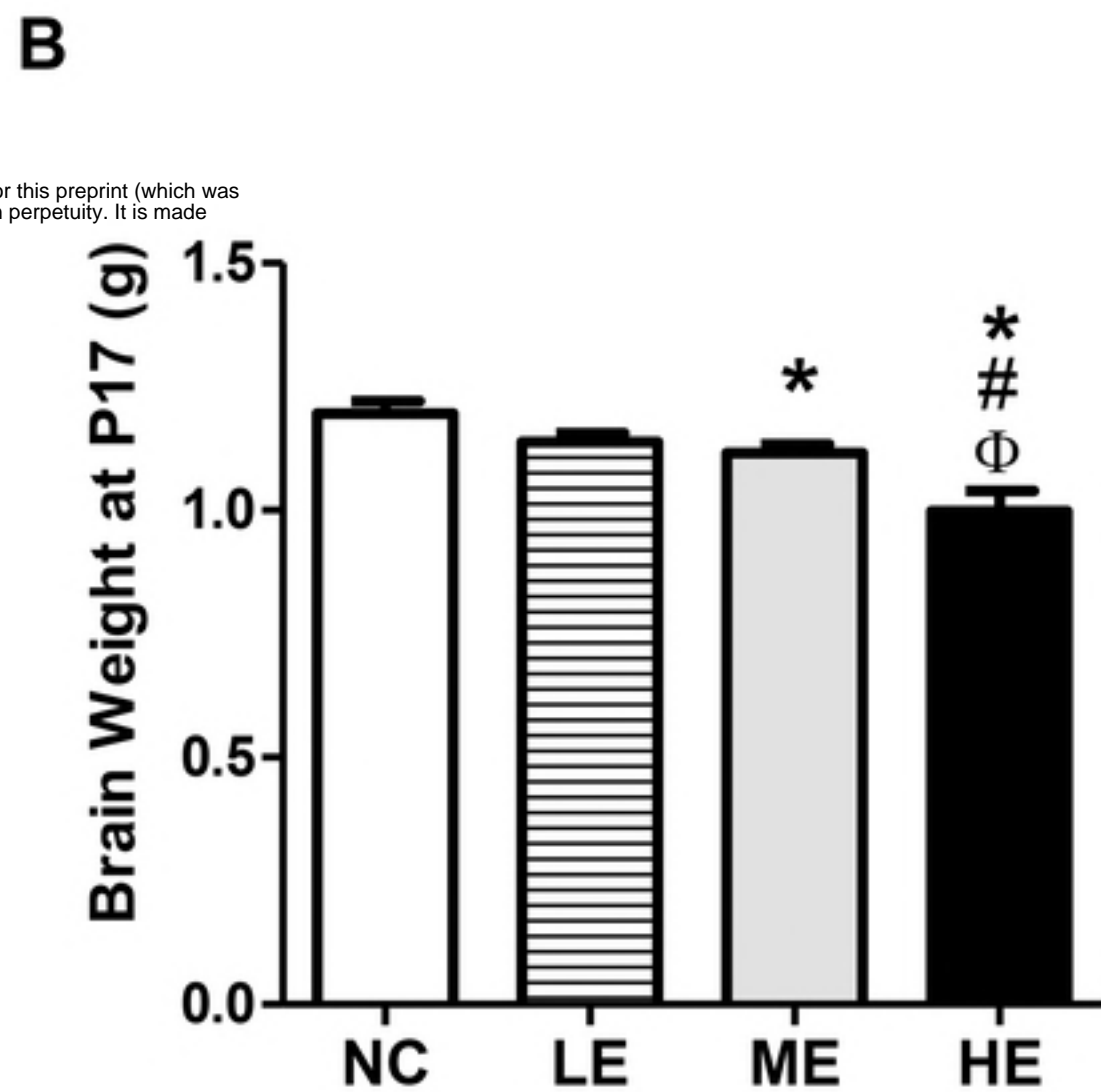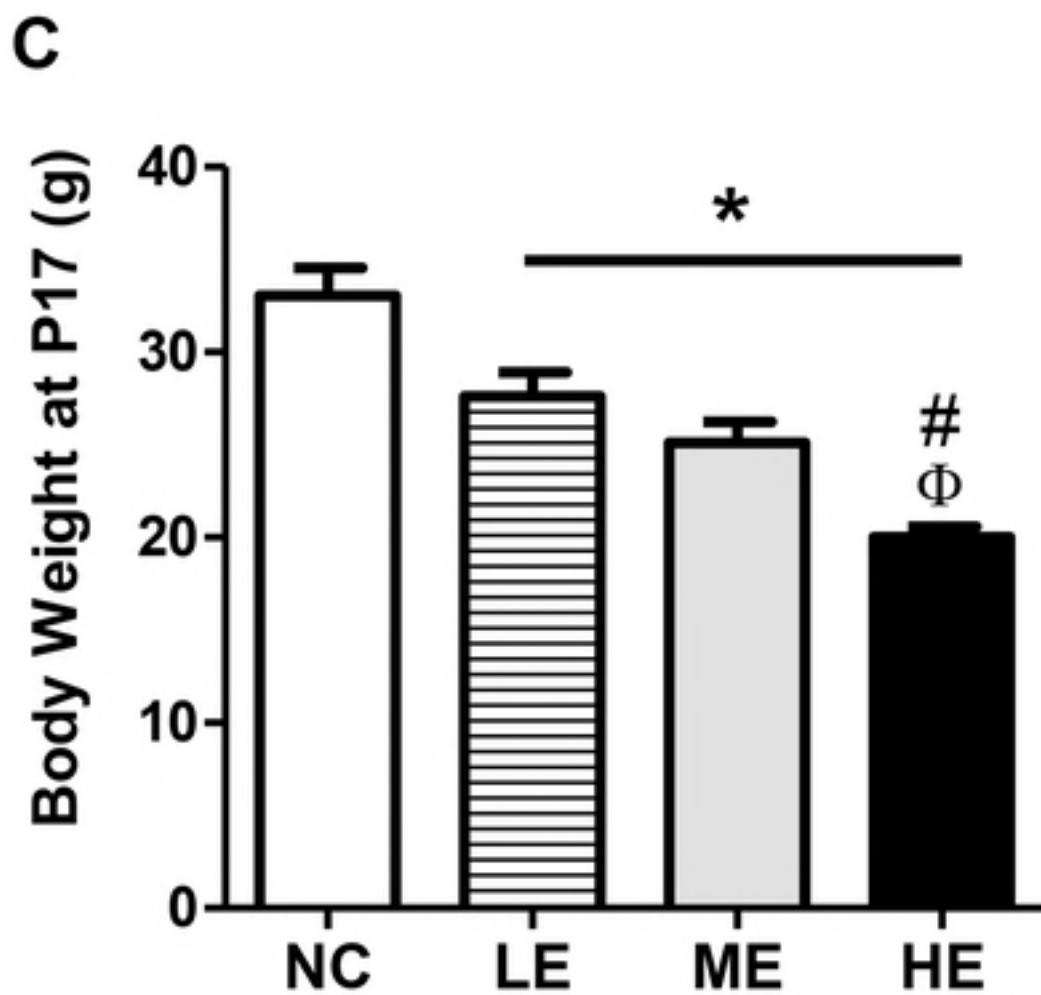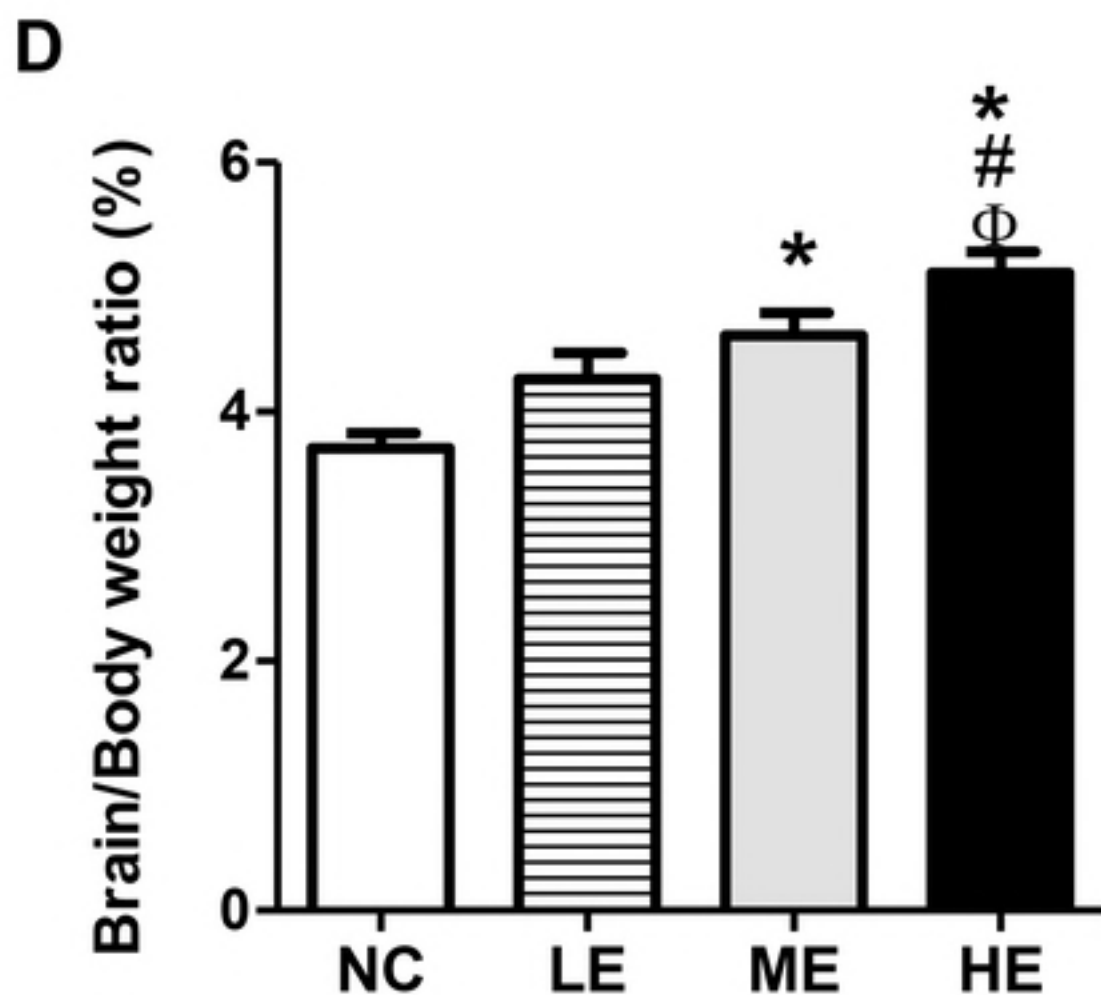

# E.coli (CSF)

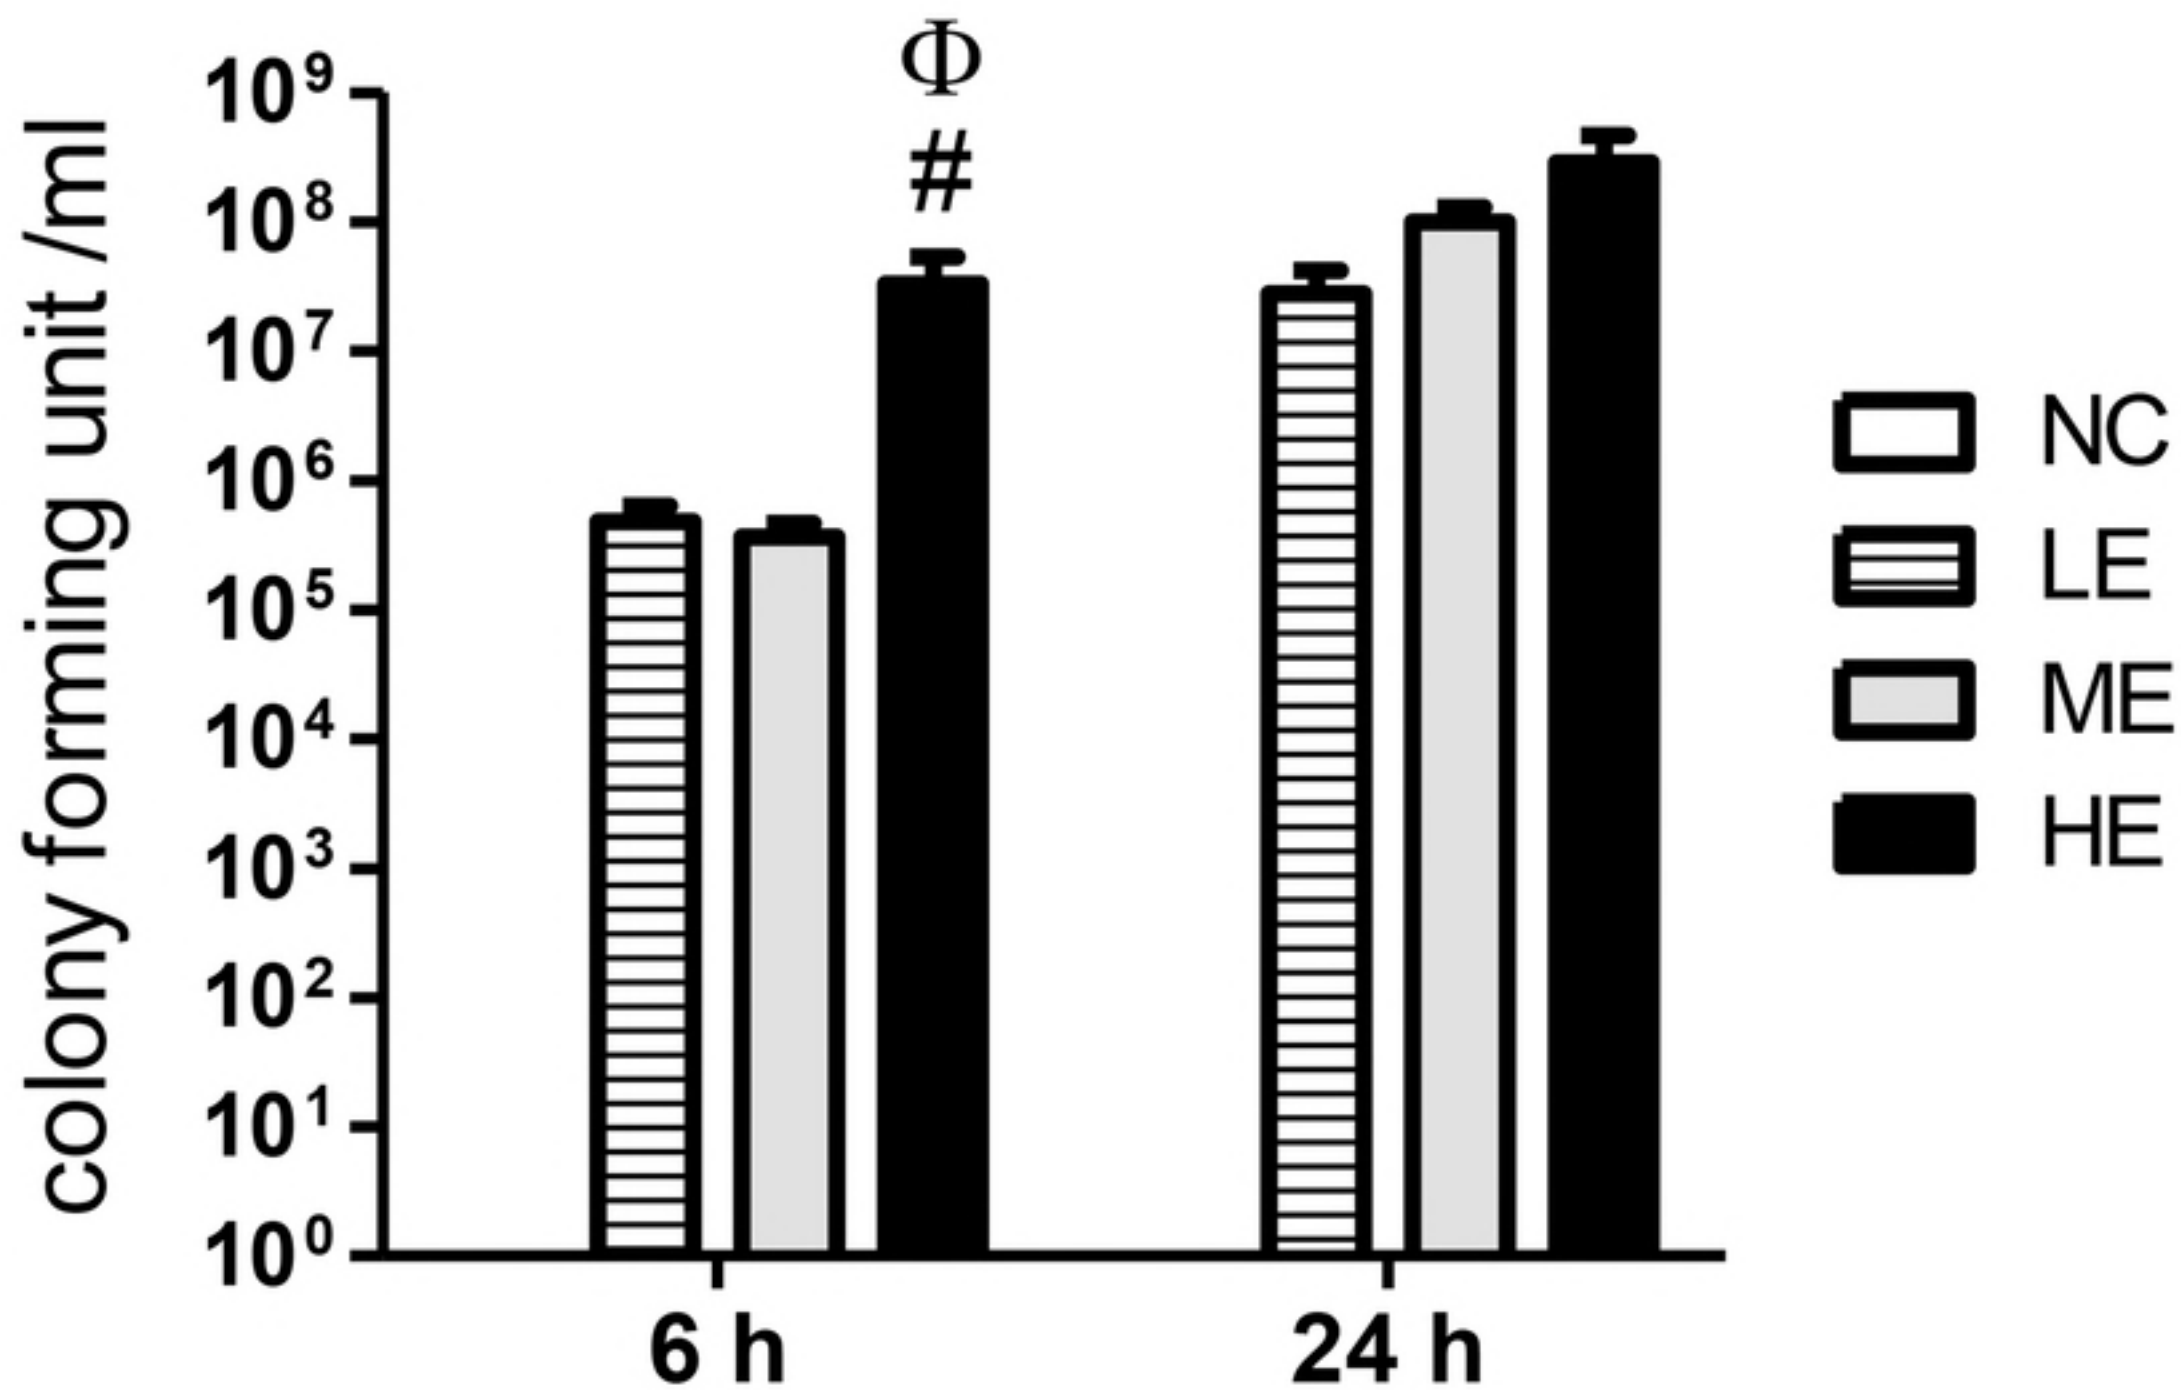

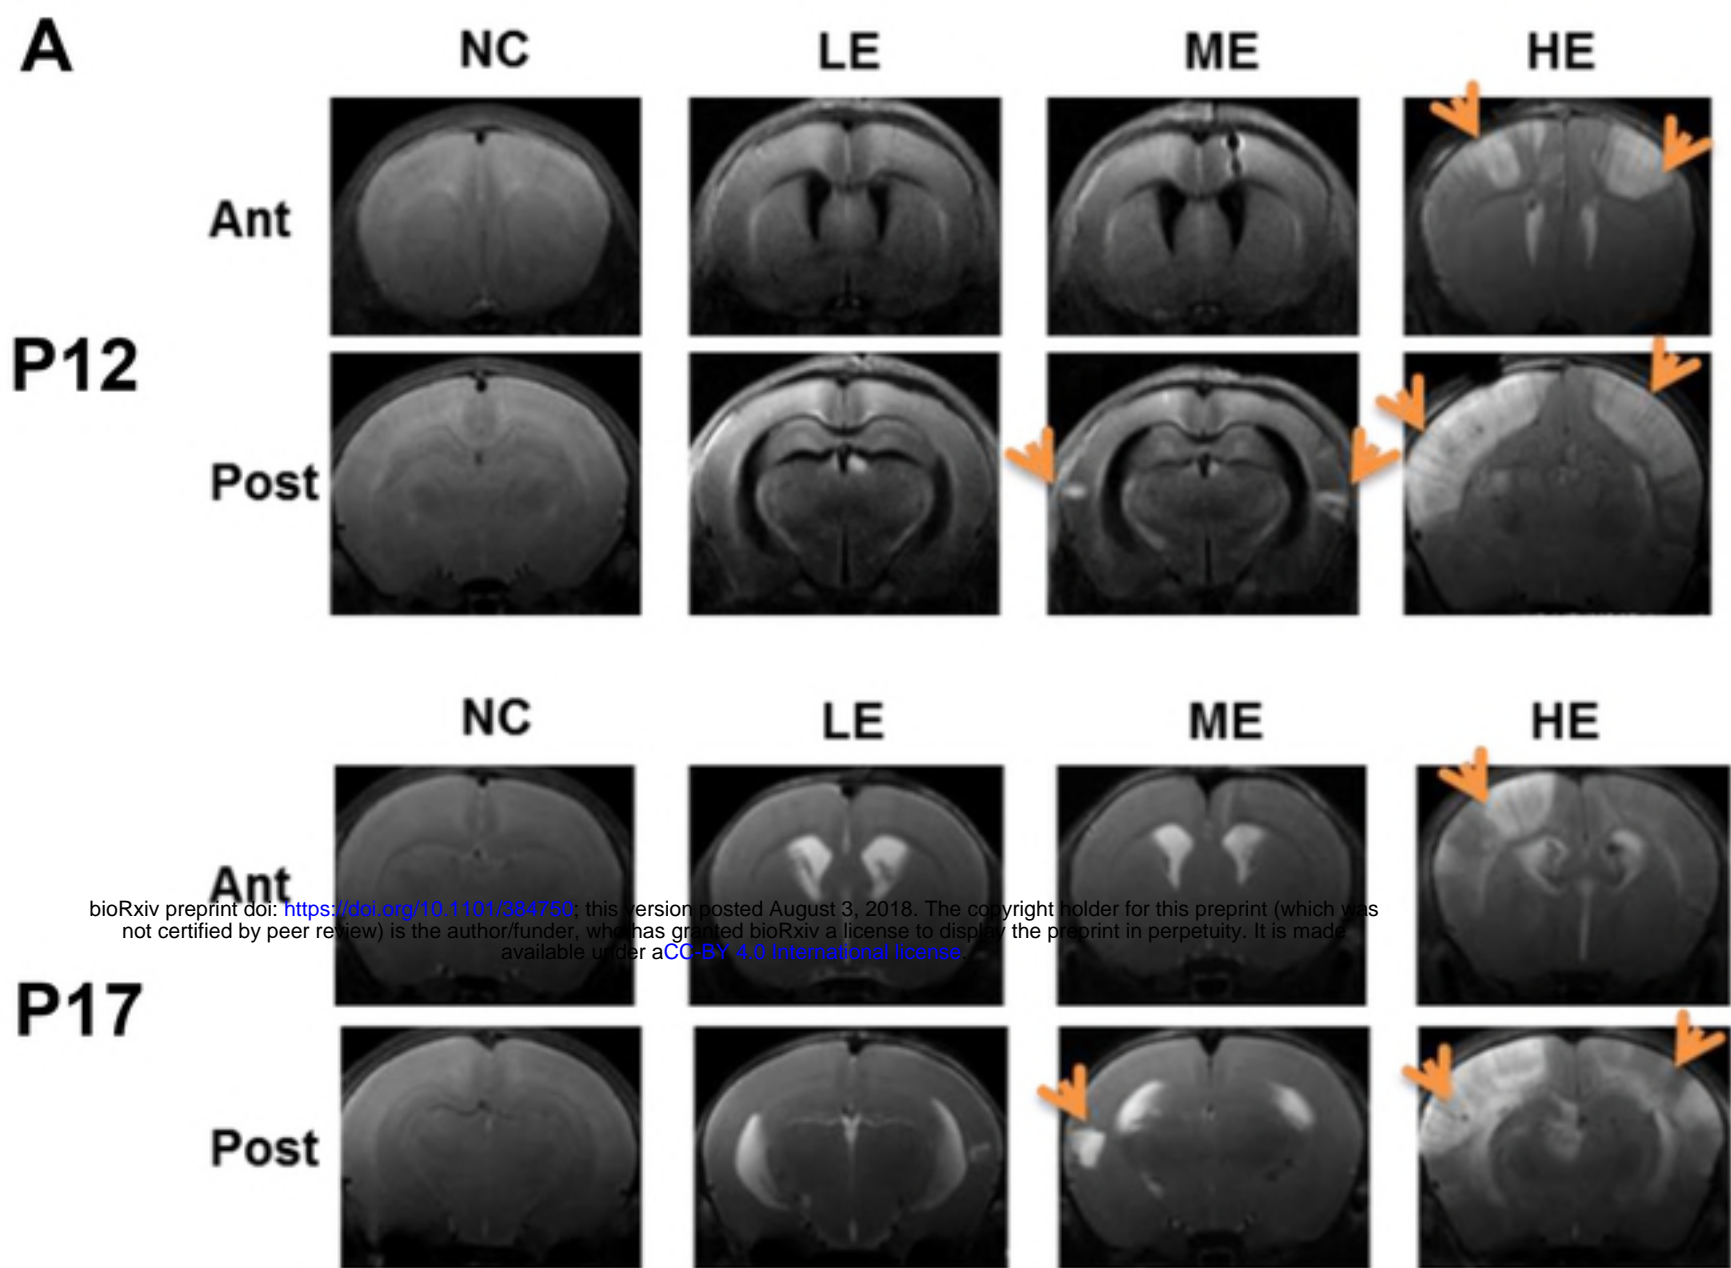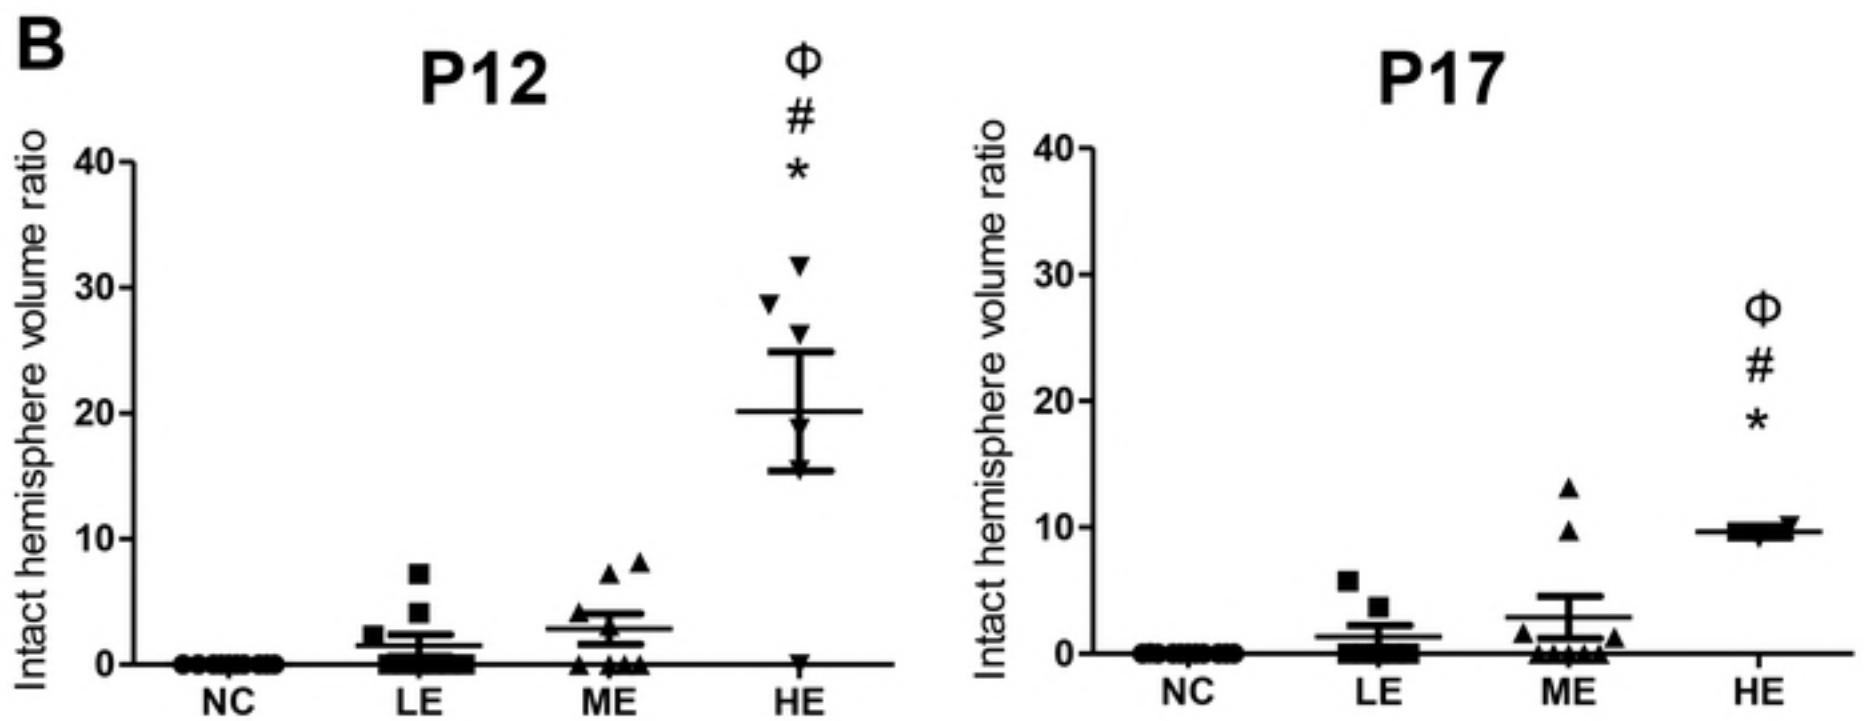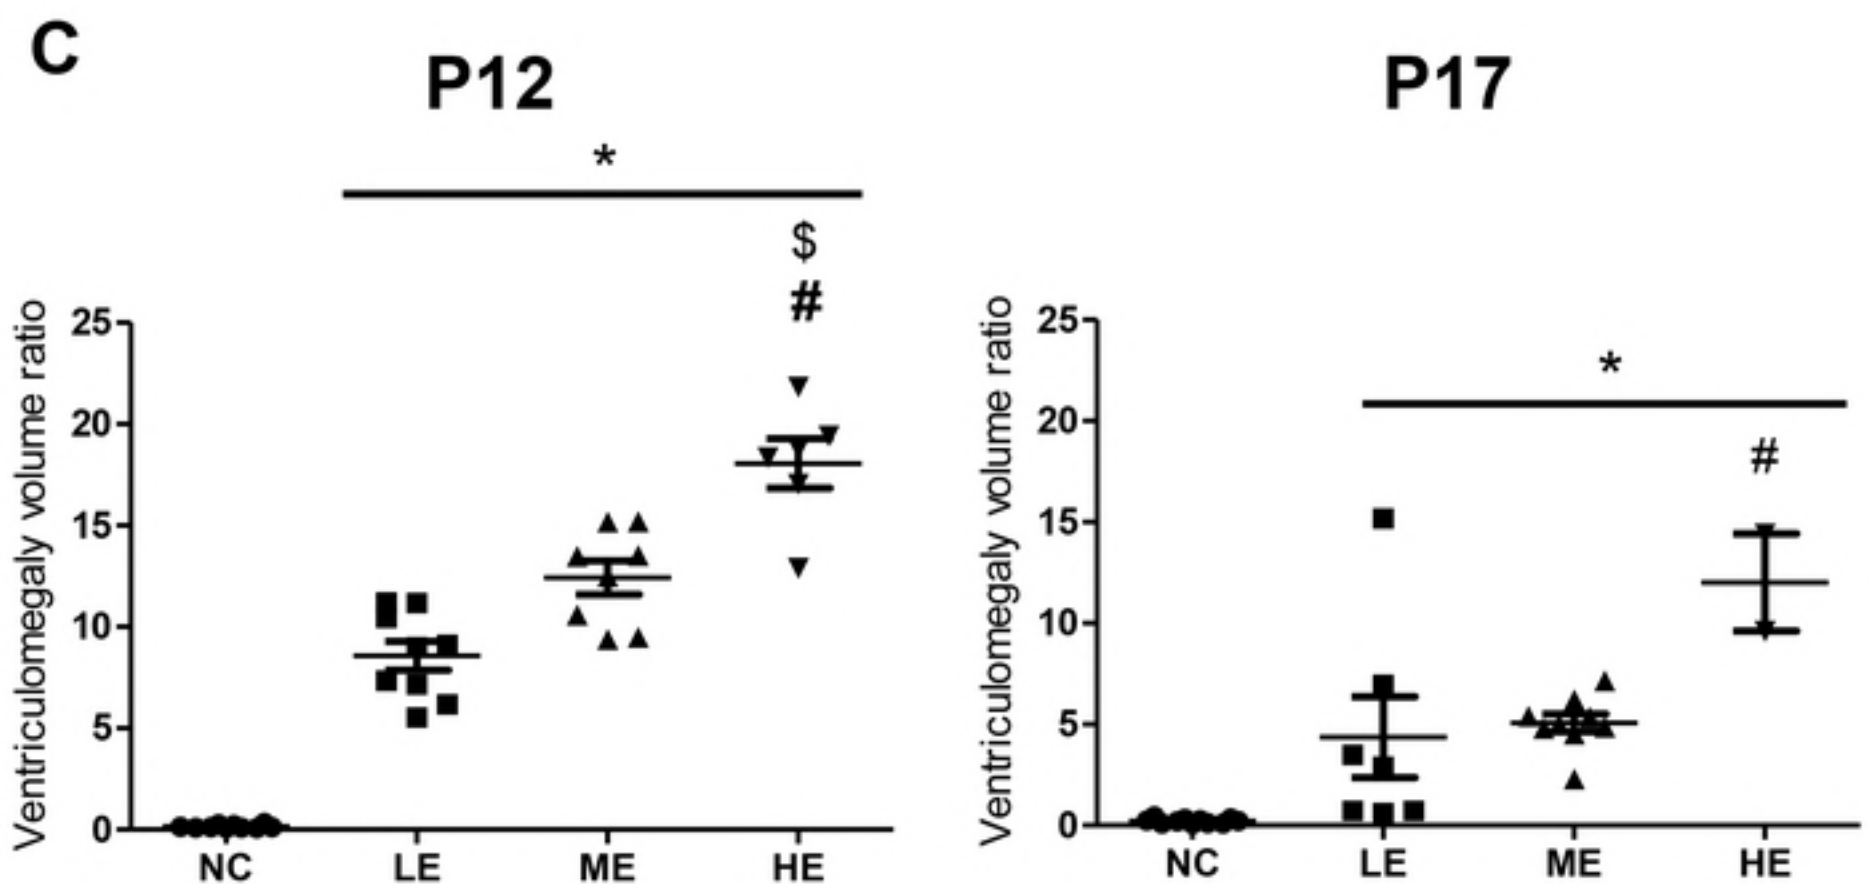

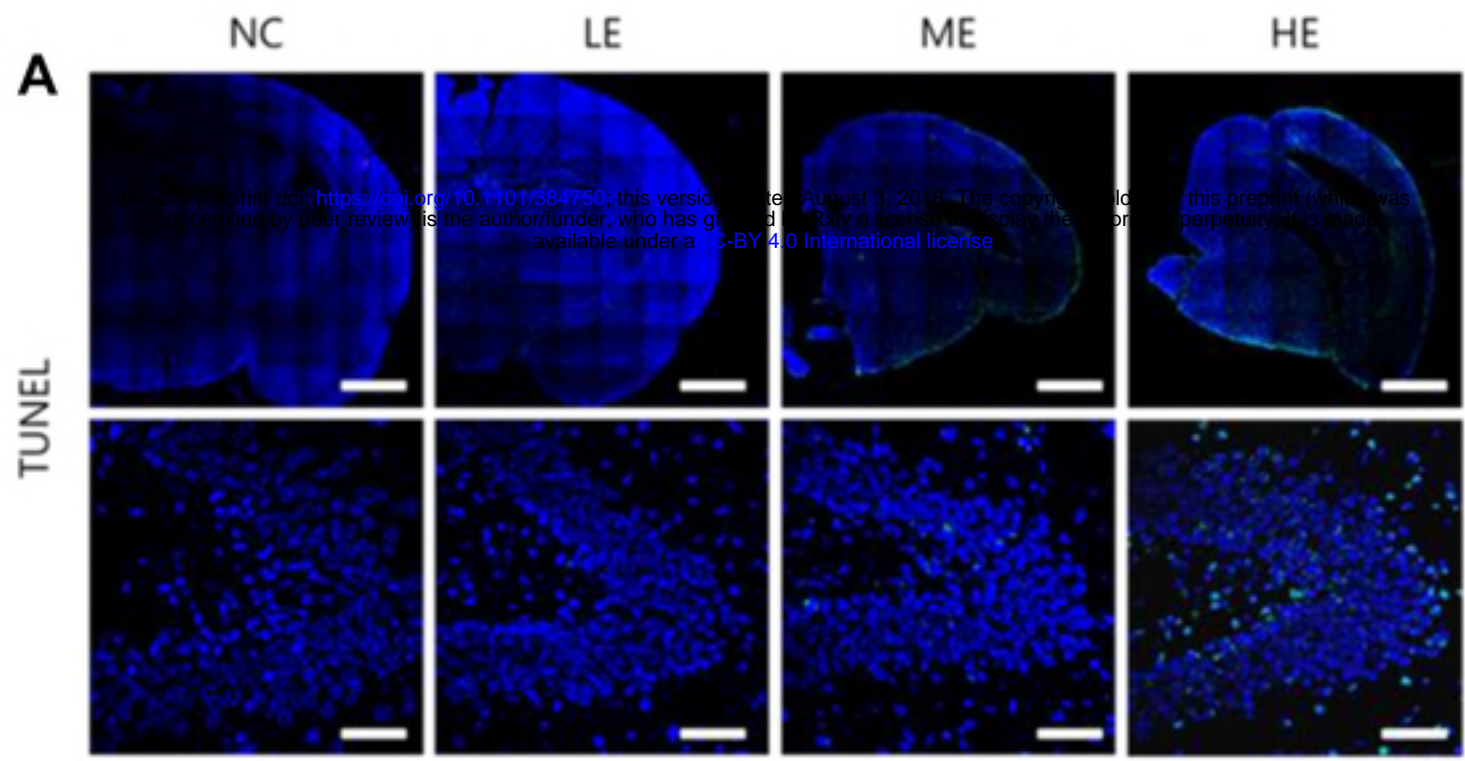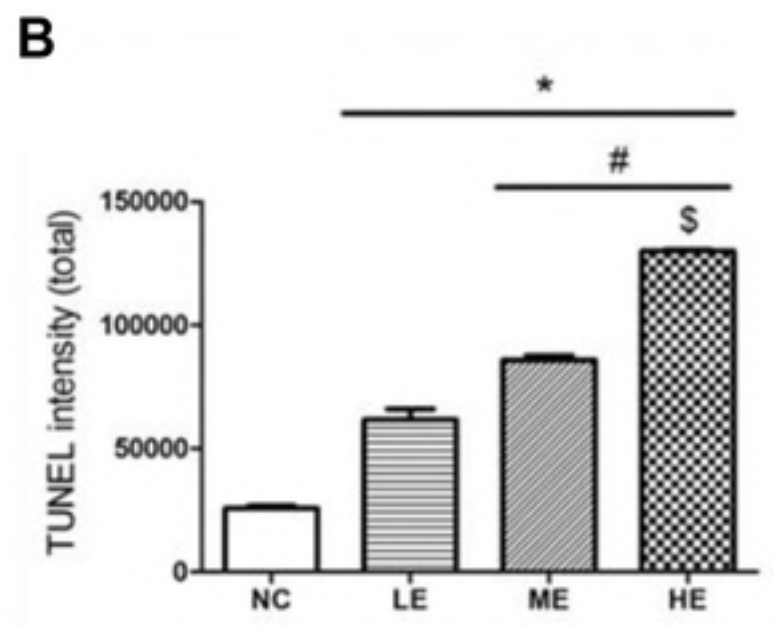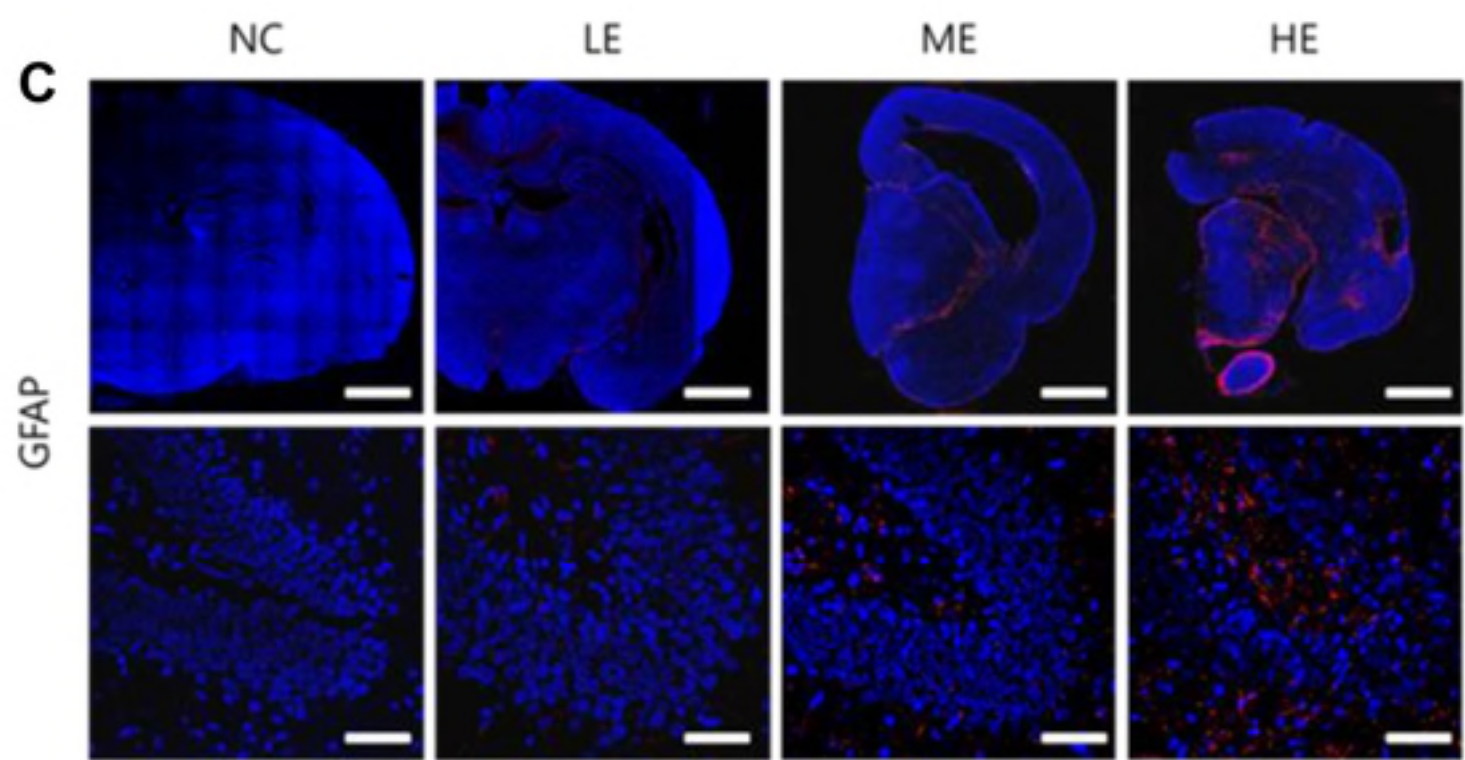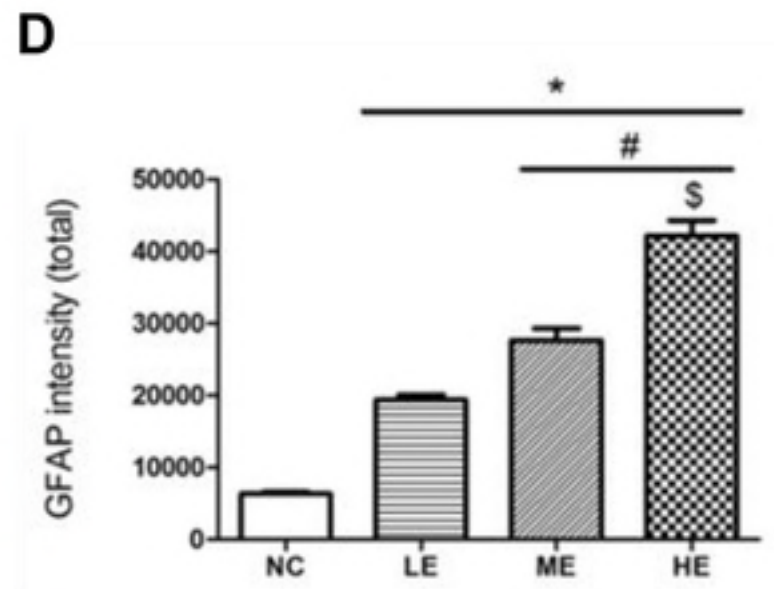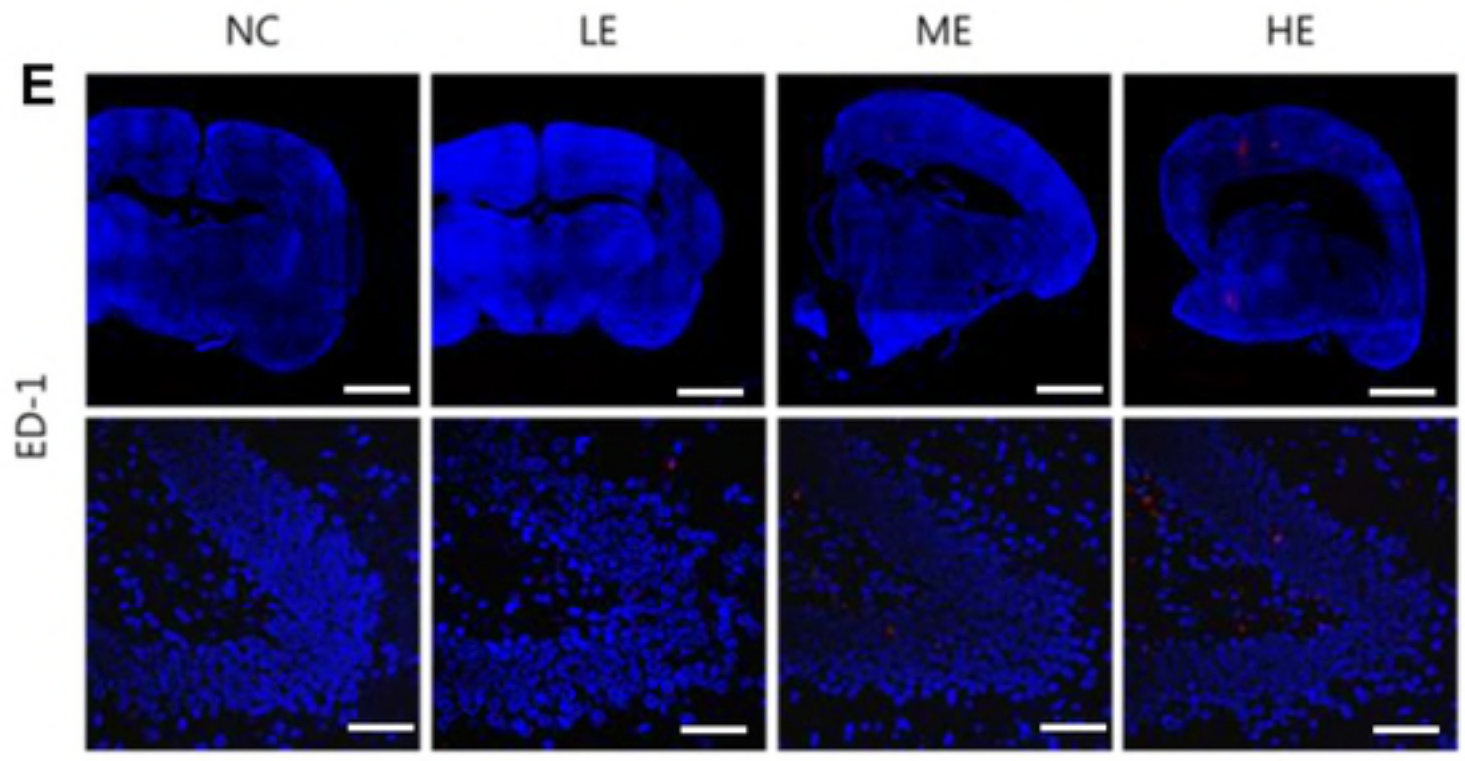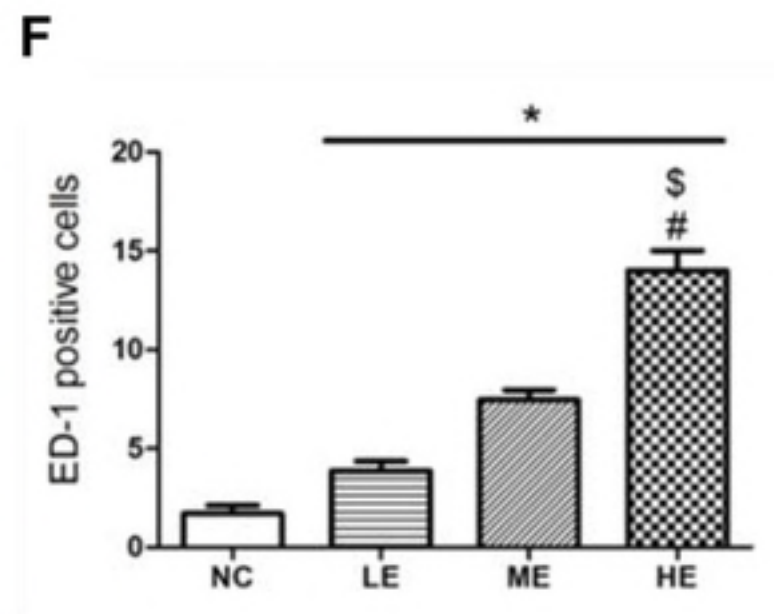

**A****Brain tissue (P12)**

(pg/ml)

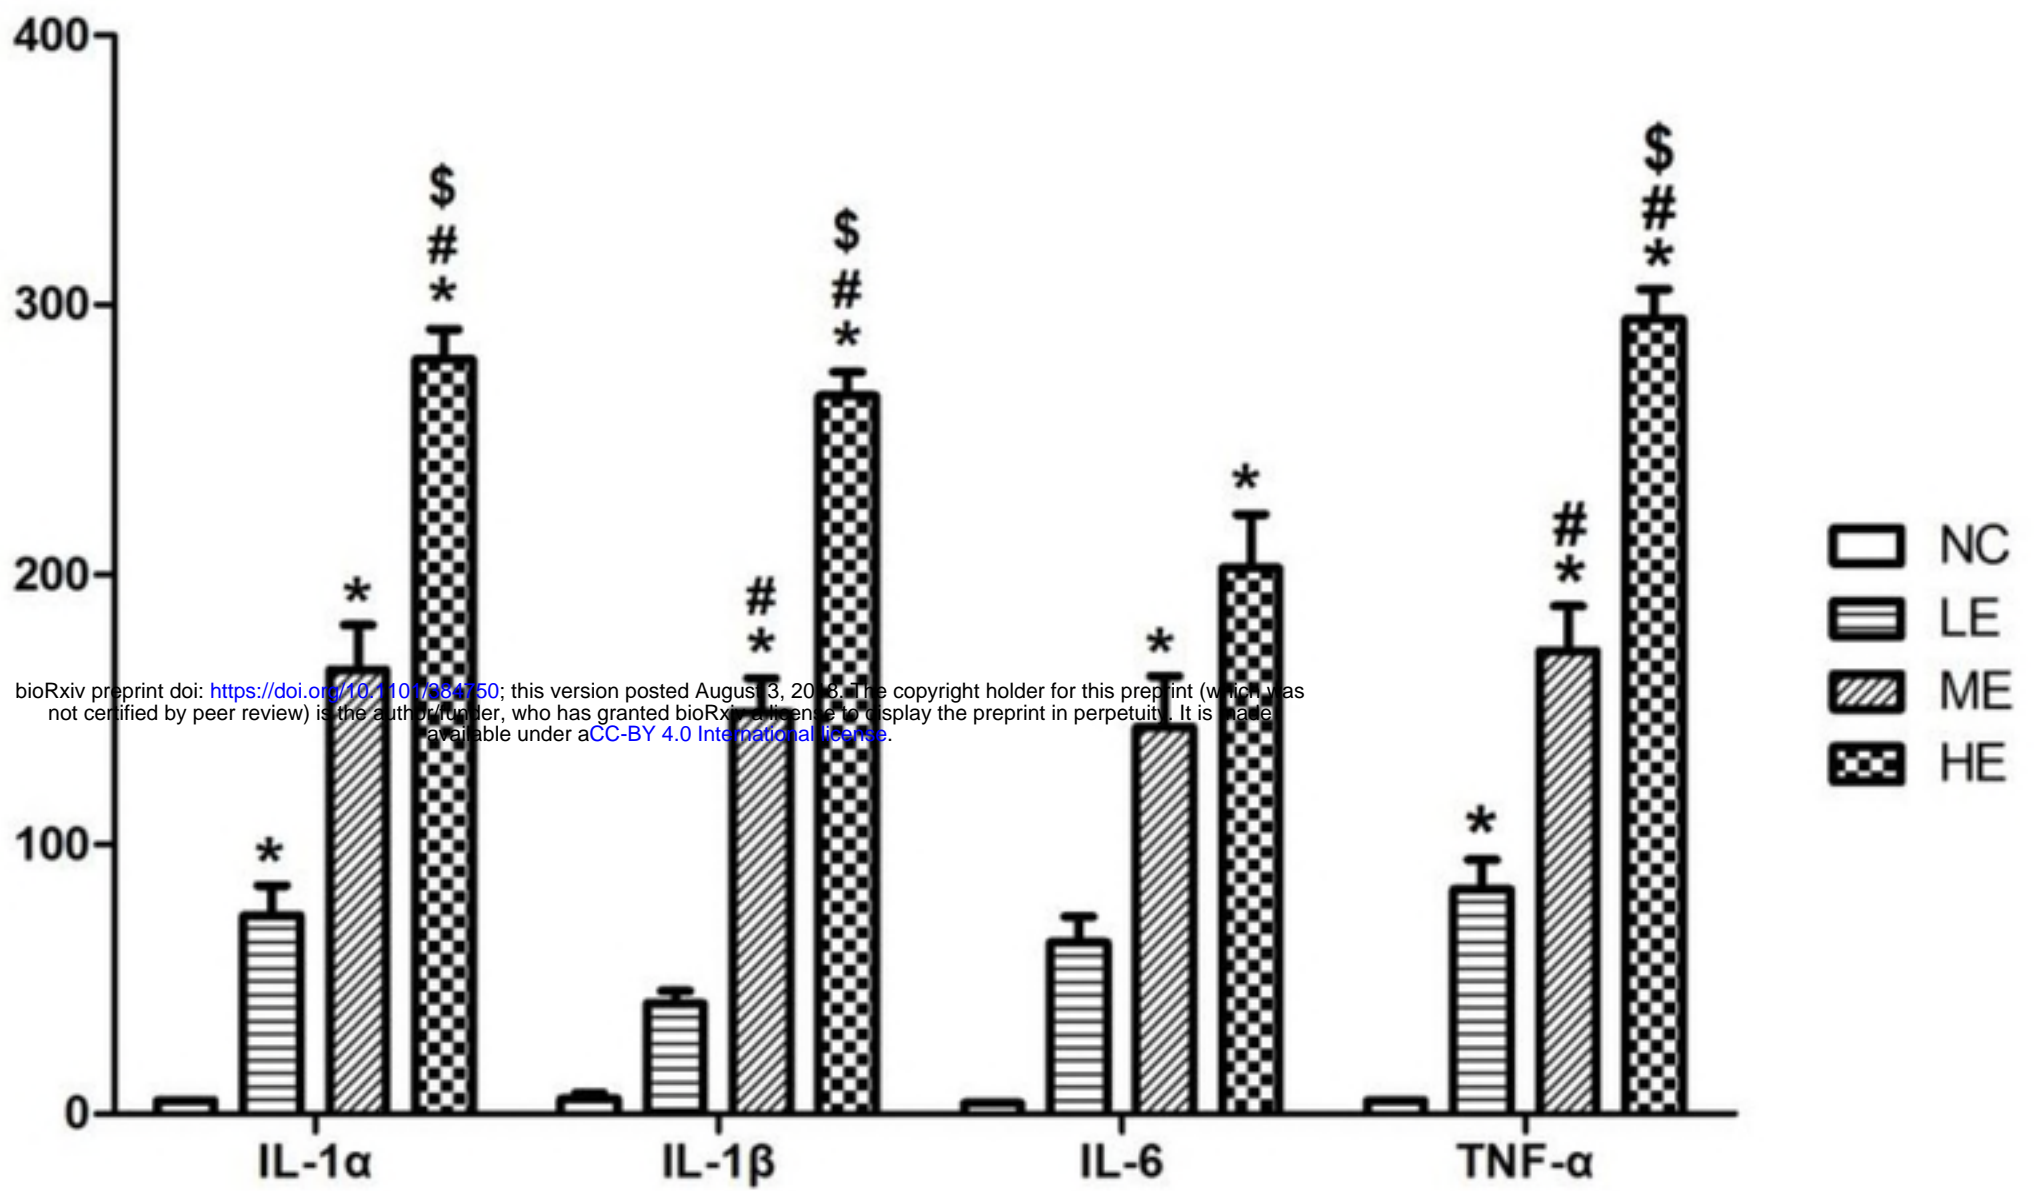**B****Brain tissue (P17)**

(pg/ml)

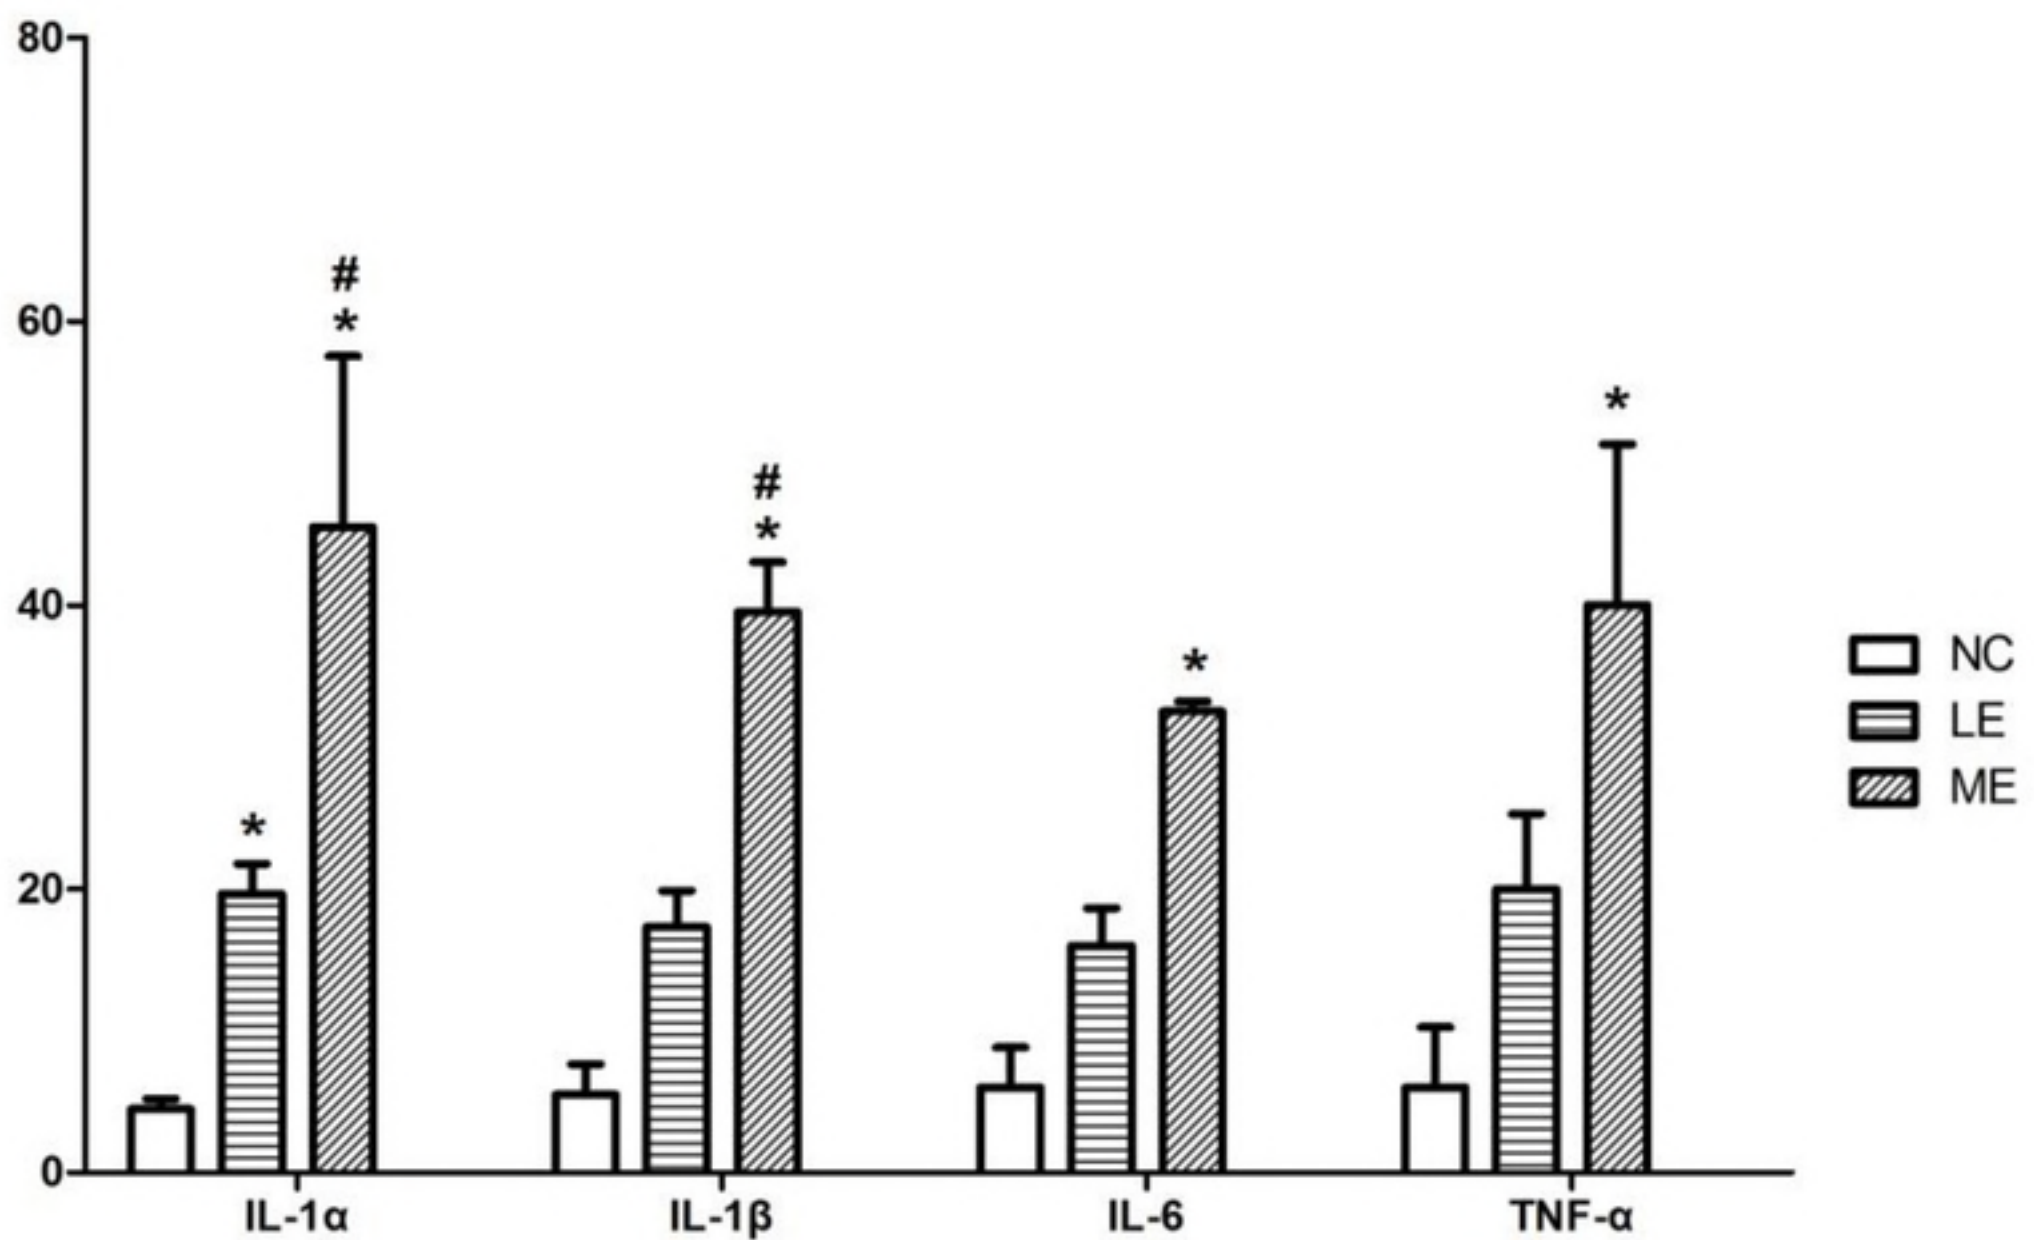

Source: https://www.biorxiv.org/content/10.1101/384750v1.full.pdf
